# Supplementary material for: Study protocol for a multicentre nationwide prospective cohort study to investigate the natural course and clinical outcome in benign liver tumours and cysts in the Netherlands: the BELIVER study
Source: PubMed Central journal article supplement — BMJ Open. 2022 Sep 8;12(9):e055104. doi: 10.1136/bmjopen-2021-055104 (PMC9462085; doi:10.1136/bmjopen-2021-055104), 2022-09-08
Supplement: bmjopen-2021-055104.draft_revisions.pdf [file bmjopen-2021-055104.draft_revisions.pdf]

# BMJ Open

BMJ Open is committed to open peer review. As part of this commitment we make the peer review history of every article we publish publicly available.

When an article is published we post the peer reviewers' comments and the authors' responses online. We also post the versions of the paper that were used during peer review. These are the versions that the peer review comments apply to.

The versions of the paper that follow are the versions that were submitted during the peer review process. They are not the versions of record or the final published versions. They should not be cited or distributed as the published version of this manuscript.

BMJ Open is an open access journal and the full, final, typeset and author-corrected version of record of the manuscript is available on our site with no access controls, subscription charges or pay-per-view fees (<http://bmjopen.bmj.com>).

If you have any questions on BMJ Open's open peer review process please email [info.bmjopen@bmj.com](mailto:info.bmjopen@bmj.com)

# BMJ Open

## Study protocol for a multicenter nationwide prospective cohort study to investigate the natural course and clinical outcome in benign liver tumors and cysts in the Netherlands: the BELIVER study

|                               |                                                                                                                                                                                                                                                                                                                                                                                                                                                                                                                                                                                                                                                                                                                                                                                                                                                                                                                                                                                                                                                                                                                                                                                                                                                                                                                                                                                                                                                                                                                                                                                                                                                                                                                                                                                                                                                                                                                                                                                                                                                                                                                                                                                                                                  |
|-------------------------------|----------------------------------------------------------------------------------------------------------------------------------------------------------------------------------------------------------------------------------------------------------------------------------------------------------------------------------------------------------------------------------------------------------------------------------------------------------------------------------------------------------------------------------------------------------------------------------------------------------------------------------------------------------------------------------------------------------------------------------------------------------------------------------------------------------------------------------------------------------------------------------------------------------------------------------------------------------------------------------------------------------------------------------------------------------------------------------------------------------------------------------------------------------------------------------------------------------------------------------------------------------------------------------------------------------------------------------------------------------------------------------------------------------------------------------------------------------------------------------------------------------------------------------------------------------------------------------------------------------------------------------------------------------------------------------------------------------------------------------------------------------------------------------------------------------------------------------------------------------------------------------------------------------------------------------------------------------------------------------------------------------------------------------------------------------------------------------------------------------------------------------------------------------------------------------------------------------------------------------|
| Journal:                      | <i>BMJ Open</i>                                                                                                                                                                                                                                                                                                                                                                                                                                                                                                                                                                                                                                                                                                                                                                                                                                                                                                                                                                                                                                                                                                                                                                                                                                                                                                                                                                                                                                                                                                                                                                                                                                                                                                                                                                                                                                                                                                                                                                                                                                                                                                                                                                                                                  |
| Manuscript ID                 | bmjopen-2021-055104                                                                                                                                                                                                                                                                                                                                                                                                                                                                                                                                                                                                                                                                                                                                                                                                                                                                                                                                                                                                                                                                                                                                                                                                                                                                                                                                                                                                                                                                                                                                                                                                                                                                                                                                                                                                                                                                                                                                                                                                                                                                                                                                                                                                              |
| Article Type:                 | Protocol                                                                                                                                                                                                                                                                                                                                                                                                                                                                                                                                                                                                                                                                                                                                                                                                                                                                                                                                                                                                                                                                                                                                                                                                                                                                                                                                                                                                                                                                                                                                                                                                                                                                                                                                                                                                                                                                                                                                                                                                                                                                                                                                                                                                                         |
| Date Submitted by the Author: | 05-Jul-2021                                                                                                                                                                                                                                                                                                                                                                                                                                                                                                                                                                                                                                                                                                                                                                                                                                                                                                                                                                                                                                                                                                                                                                                                                                                                                                                                                                                                                                                                                                                                                                                                                                                                                                                                                                                                                                                                                                                                                                                                                                                                                                                                                                                                                      |
| Complete List of Authors:     | <p>Furumaya, Alicia; Amsterdam University Medical Centres, Department of Surgery; University of Amsterdam<br/> Haring, Martijn; University Medical Centre Groningen, Department of Surgery; University of Groningen<br/> van Rosmalen, Belle; Amsterdam University Medical Centres, Department of Surgery; University of Amsterdam<br/> Klompshouwer, Anne; Erasmus Medical Center, Department of Surgery; Erasmus University Rotterdam<br/> Besselink, Marc; Amsterdam University Medical Centres, Department of Surgery; University of Amsterdam<br/> de Man, Robert; Erasmus Medical Center, Department of Gastroenterology and Hepatology; Erasmus University Rotterdam<br/> IJzermans, Jan; Erasmus Medical Center, Department of Surgery; Erasmus University Rotterdam<br/> Thomeer, Maarten; Erasmus Medical Center, Department of Radiology; Erasmus University Rotterdam<br/> Kramer, Matthijs; Maastricht University Medical Centre+, Department of Gastroenterology and Hepatology; Maastricht University<br/> Coolen, Mariëlle; Maastricht University Medical Centre+, Department of Surgery; Maastricht University<br/> Tushuizen, Maarten; Leiden University Medical Center, Department of Gastroenterology and Hepatology; Leiden University<br/> Schaapherder, A.F.M.; Leiden University Medical Center, Department of Surgery; Leiden University<br/> de Haas, Robbert; University Medical Centre Groningen, Department of Radiology; University of Groningen<br/> Duiker, Evelien; University Medical Centre Groningen, Department of Pathology and Medical Biology; University of Groningen<br/> Kazemier, Geert; Amsterdam University Medical Centres, Department of Surgery; Vrije Universiteit Amsterdam<br/> van Delden, Otto; Amsterdam University Medical Centres, Department of Radiology; University of Amsterdam<br/> Verheij, Joanne; Amsterdam University Medical Centres, Department of Pathology; University of Amsterdam<br/> Takkenberg, R.; Amsterdam University Medical Centres, Department of Gastroenterology and Hepatology; University of Amsterdam<br/> Cuperus, Frans; University Medical Centre Groningen, Department of Gastroenterology and Hepatology; University of Groningen</p> |

1  
2  
3  
4  
5  
6  
7  
8  
9  
10  
11  
12  
13  
14  
15  
16  
17  
18  
19  
20  
21  
22  
23  
24  
25  
26  
27  
28  
29  
30  
31  
32  
33  
34  
35  
36  
37  
38  
39  
40  
41  
42  
43  
44  
45  
46  
47  
48  
49  
50  
51  
52  
53  
54  
55  
56  
57  
58  
59  
60

|           |                                                                                                                                                                                                                 |
|-----------|-----------------------------------------------------------------------------------------------------------------------------------------------------------------------------------------------------------------|
|           | De Meijer, Vincent; University Medical Centre Groningen, Department of Surgery; University of Groningen<br>Erdmann, Joris; Amsterdam University Medical Centres, Department of Surgery; University of Amsterdam |
| Keywords: | Hepatobiliary surgery < SURGERY, Hepatobiliary tumours < ONCOLOGY, Hepatobiliary disease < GASTROENTEROLOGY                                                                                                     |
|           |                                                                                                                                                                                                                 |

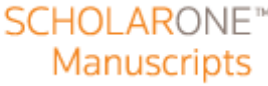

1  
2  
3  
4  
5  
6  
7  
8  
9  
10  
11  
12  
13  
14

## Study protocol for a multicenter nationwide prospective cohort study to investigate the natural course and clinical outcome in benign liver tumours and cysts in the Netherlands: the BELIVER study

Alicia Furumaya\*<sup>1</sup>, Martijn P.D. Haring\*<sup>2</sup>, Belle V. van Rosmalen<sup>1</sup>, Anne J. Klompenhouwer<sup>3</sup>, Marc G. Besselink<sup>1</sup>, Robert A. de Man<sup>4</sup>, Jan N.M. IJzermans<sup>3</sup>, Maarten G.J. Thomeer<sup>5</sup>, Matthijs Kramer<sup>6</sup>, Mariëlle M.E. Coolen<sup>7</sup>, Maarten E. Tushuizen<sup>8</sup>, Alexander F. Schaapherder<sup>9</sup>, Robbert J. de Haas<sup>10</sup>, Evelien W. Duiker<sup>11</sup>, Geert Kazemier<sup>12</sup>, Otto M. van Delden<sup>13</sup>, Joanne Verheij<sup>14</sup>, R. Bart Takkenberg<sup>15</sup>, Frans J.C. Cuperus<sup>16</sup>, Vincent E. de Meijer<sup>2#</sup>, Joris I. Erdmann<sup>1#</sup>; Dutch Benign Liver Tumor Group (DBLTG)

15 \* Shared first authorship

16 # Shared senior authorship

- 17  
18  
19  
20  
21  
22  
23  
24  
25  
26  
27  
28  
29  
30  
31  
32  
33  
34  
35  
36  
37  
38  
39  
40  
41  
42  
43  
44
- 1 Department of Surgery, Amsterdam Gastroenterology Endocrinology Metabolism, Amsterdam UMC, University of Amsterdam, The Netherlands
  - 2 Department of Surgery, University Medical Center Groningen, University of Groningen, Groningen, The Netherlands
  - 3 Department of Surgery, Erasmus MC, Erasmus University Rotterdam, Rotterdam, The Netherlands
  - 4 Department of Gastroenterology and Hepatology, Erasmus MC, Erasmus University Rotterdam, Rotterdam, The Netherlands
  - 5 Department of Radiology, Erasmus MC, Erasmus University Rotterdam, Rotterdam, The Netherlands
  - 6 Department of Gastroenterology and Hepatology, Maastricht University Medical Center+, Maastricht University, Maastricht, The Netherlands
  - 7 Department of Surgery, Maastricht University Medical Center+, Maastricht University, Maastricht, The Netherlands
  - 8 Department of Gastroenterology and Hepatology, Leiden UMC, Leiden University, Leiden, The Netherlands
  - 9 Department of Surgery, Leiden UMC, Leiden University, The Netherlands
  - 10 Department of Radiology, University Medical Center Groningen, University of Groningen, Groningen, The Netherlands
  - 11 Department of Pathology and Medical Biology, University Medical Center Groningen, University of Groningen, Groningen, The Netherlands
  - 12 Department of Surgery, Amsterdam Gastroenterology Endocrinology Metabolism, Amsterdam UMC, Vrije Universiteit, The Netherlands
  - 13 Department of Radiology, Amsterdam Gastroenterology Endocrinology Metabolism, Amsterdam UMC, University of Amsterdam, The Netherlands
  - 14 Department of Pathology, Amsterdam Gastroenterology Endocrinology Metabolism, Amsterdam UMC, University of Amsterdam, The Netherlands
  - 15 Department of Gastroenterology and Hepatology, Amsterdam Gastroenterology Endocrinology Metabolism, Amsterdam UMC, University of Amsterdam, The Netherlands
  - 16 Department of Gastroenterology and Hepatology, University Medical Center Groningen, University of Groningen, The Netherlands

45 **#Correspondence to:**

46 Vincent E. de Meijer  
47 Department of Surgery  
48 UMCG, University of Groningen, The Netherlands  
49 Email: v.e.de.meijer@umcg.nl

Joris I. Erdmann  
Department of Surgery,  
Amsterdam UMC, University of Amsterdam, The Netherlands  
Email: j.i.erdmann@amsterdamumc.nl

51 **Key words:** Benign Liver Tumours and Cysts, Patient Reported Outcomes, Surgery, Interventional Radiology, Study Protocol

52  
53  
54  
55  
56  
57  
58  
59  
60

1  
2  
3 **1 Abstract**

4  
5 **2 Introduction:** Benign liver tumours and cysts (BLTCs) comprise a heterogeneous group of cystic and  
6  
7 solid lesions, including hepatic hemangioma, focal nodular hyperplasia and hepatocellular adenoma.  
8  
9 Some BLTCs, for example (large) hepatocellular adenoma, are at risk of complications. Incidence of  
10  
11 malignant degeneration or hemorrhage is low in most other BLTCs. Nevertheless, the diagnosis BLTC  
12  
13 may carry a substantial burden and patients may be symptomatic, necessitating treatment. The  
14  
15 indications for interventions remain matter of debate. The primary study aim is to investigate patient  
16  
17 reported outcomes (PROs) of patients with BLTCs, with special regard to the influence of invasive  
18  
19 treatment as compared to the natural course of the disease.  
20  
21

22  
23 **10 Methods and analysis:** A nationwide observational cohort study of BLTC patients will be performed  
24  
25 between August 2021 and August 2026. Inclusion will be open from August 2021 until August 2025.  
26  
27 During surveillance, a questionnaire regarding symptoms and their impact will be sent to participants  
28  
29 on a biannual basis and more often in case of invasive intervention. The questionnaire was previously  
30  
31 developed based on patient reported outcomes (PROs) considered relevant to patients with BLTCs  
32  
33 and their caregivers. Most questionnaires will be administered by computerized adaptive testing  
34  
35 through the Patient-Reported Outcomes Measurement Information System (PROMIS). Data, such as  
36  
37 treatment outcomes, will be extracted from electronic patient files. Multivariable analysis will be  
38  
39 performed to identify patient and tumour characteristics associated with significant improvement in  
40  
41 PROs or a complicated postoperative course.  
42  
43  
44

45 **20 Ethics and dissemination:** The study was assessed by the Medical Ethics Committee of the University  
46  
47 Medical Center Groningen and the Amsterdam UMC. Local consultants will provide information and  
48  
49 informed consent will be asked of all patients. Results will be published in a peer-reviewed journal.  
50  
51

52 **23 Study registration:** Netherlands Trial Register - NL8231 - 10-12-2019  
53  
54  
55  
56  
57  
58  
59  
60

1  
2  
3 24 **Strengths and limitations of this study**  
4

- 5 25 • The BELIVER-study will lead to an expansion of the current knowledge on patient reported  
6  
7 26 outcomes (PROs) in patients with benign liver tumours and cysts (BLTCs) in the  
8  
9 27 Netherlands and the influence of interventions hereupon  
10  
11  
12 28 • The long-term, biannual follow-up and increased frequency of questionnaires  
13  
14 29 postoperatively will provide data to enable professionals to better inform patients what  
15  
16 30 to expect and to enable patients and professionals to make well-informed treatment  
17  
18 31 decisions together  
19  
20  
21 32 • As the study is conducted nationwide, the extent of medical practice variation regarding  
22  
23 33 management of BLTCs can be assessed  
24  
25 34 • Questionnaires are continued even after cessation of medical follow-up, which may  
26  
27 35 introduce disease burden but may just as well be a confirmation of wellbeing for patients  
28  
29  
30 36 • Patient burden is minimized through use of questionnaires using computerized adaptive  
31  
32 37 testing  
33  
34  
35  
36  
37  
38  
39  
40  
41  
42  
43  
44  
45  
46  
47  
48  
49  
50  
51  
52  
53  
54  
55  
56  
57  
58  
59  
60

## 38 Introduction

39 Benign liver tumours and cysts (BLTCs) comprise a heterogeneous groups of cystic and solid  
40 lesions.<sup>1</sup> Although extensive research has been performed in the field of BLTCs, their natural course  
41 including their influence on patient reported outcomes (PROs) has been underexposed. The most  
42 common and relevant BLTC are simple non-parasitic liver cysts (estimated incidence of 18%) and the  
43 solid lesions hepatic hemangioma (0.4-20%), focal nodular hyperplasia (FNH, 0.4-3%), and  
44 hepatocellular adenoma (HCA, 0.001-0.004%).<sup>2-5</sup>

45 Many BLTCs are found incidentally on routine imaging for unrelated pathology.<sup>2,6</sup> The rising  
46 incidence of those so called incidentalomas is at least partly attributable to the increasing use of non-  
47 invasive imaging modalities.<sup>7</sup> Main complications of BLTCs are bleeding and malignant  
48 transformation - both of which rarely occur.<sup>8,9</sup> Of the four most common and relevant solid and cystic  
49 lesions, only (large) HCAs have a known risk of malignant transformation.<sup>9</sup> Treatment indications  
50 remain an important matter of debate. In general, treatment of BLTCs is only recommended when  
51 they either have a risk of complications or cause severe complaints often with associated impairment  
52 of quality of life. When little or no risk of complications is present, the latter is often the sole  
53 indication for treatment.<sup>2</sup>

54 However, this recommendation has various nuances which hampers shared decision and makes  
55 the management of BLTCs exceptionally prone to undesirable practice variation.<sup>10,11</sup> Firstly, the  
56 influence of treatment on PROs is important but rarely reported.<sup>12</sup> Secondly, in current literature,  
57 PROs after treatment by surgery or interventional radiology are rarely compared with conservative  
58 management.<sup>12,13</sup> Finally, variations in diagnostic methods may be present, for example FNH is easily  
59 misdiagnosed as HCA when inadequate diagnostics are applied.<sup>2,14,15</sup>

60 Therefore, this observational cohort study aims to investigate the PROs of patients with BLTCs  
61 during their natural courses as well as after treatment. These data will enable patients and  
62 professionals to make well-informed treatment decisions together to optimize value-based  
63 outcomes. In addition, the study will provide an overview of the clinical practice in the Netherlands.

## 64 **Methods and analysis**

### 65 *Study design*

66 The BELIVER study (Natural Course and Clinical Outcome in BEnign LIVER Tumours and Cysts) is an  
67 investigator-initiated, nationwide, multicenter observational cohort study. All Dutch medical centers  
68 treating patients with BLTCs are eligible for participation, facilitated and coordinated through the  
69 Dutch Benign Liver Tumor Group (DBLTG) network. The study was registered in the Netherlands Trial  
70 Register (NTR NL8231).

71

### 72 *Study population*

73 Adult patients ( $\geq 18$  years old) presenting with a common and/or clinically relevant BLTC at  
74 participating centers are eligible for inclusion. Clinically relevant BLTCs are defined as all BLTCs  
75 potentially eligible for either surgical intervention or follow-up. Strict cut-off values regarding BLTC  
76 size will not be defined and are assessed on a per patient basis by treating professionals.

77 The study will be conducted from August 2021 till August 2026, with inclusion during the period of  
78 August 2021 till August 2025. Thus, the minimal follow-up for each patient will be one year. Patients  
79 diagnosed with an uncommon BLTC, unwilling or unable to provide written informed consent or to  
80 fill in the questionnaire and patients with another disease substantially affecting PROs will be  
81 excluded. Uncommon BLTCs and clinically less relevant are excluded. These include: mucinous cystic  
82 lesions of the liver and biliary system and intraductal papillary neoplasms of the liver and bile ducts  
83 (MCNs and IPNBs, "cystadenomas"), hepatic angiomyolipoma and biliary hamartoma / Von  
84 Meyenburg complexes.<sup>16</sup> Additionally, patients with polycystic liver disease are excluded as they  
85 form a circumscript group of patients with very typical symptoms and treatments, including liver  
86 transplantation and they are currently already included in another international study.<sup>17</sup>

87

### 88 *Study objectives and outcomes*



1  
2  
3 89 The primary study objective is to systematically record the PROs during the natural course and  
4  
5 90 after (minimally) invasive treatment of patients with BLTCs. Secondary study objectives are to  
6  
7 91 evaluate changes in tumour/cyst diameter and the occurrence of any mortality and complications,  
8  
9 92 related to either the natural course of the disease (malignant transformation or hemorrhage) or  
10  
11 93 related to tumour or cyst treatment. The study will also provide an overview of potential variation in  
12  
13 94 management and outcomes of Dutch patients with BLTCs.

16 95 The primary study outcome measure is change in PROs including severity of symptoms from the  
17  
18 96 start compared to the end of the follow-up period. Symptoms are measured by a questionnaire,  
19  
20 97 focusing on PROs relevant to patients with BLTCs and their caregivers and partly administered  
21  
22 98 through the Patient-Reported Outcomes Measurement Information System (PROMIS).

25 99 The questionnaire is administered biannually. Although a multiplicity would have enabled a more  
26  
27 100 accurate longitudinal study with correction for confounding events, increasing questionnaire  
28  
29 101 frequency will also probably lead to a reduction of study adherence and result in an increased patient  
30  
31 102 burden. Moreover, one might argue that continuing surveys even after cessation of medical follow-  
32  
33 103 up may introduce disease burden that remind patients of their diagnosis. However, the biannual  
34  
35 104 questionnaires may just as well be a confirmation of wellbeing for patients. In addition, currently  
36  
37 105 some patients might be subjected to extended periods of follow-up even in the absence of this study  
38  
39 106 as a consequence of practice variation.

43 107 Secondary outcomes related to interventions include: postoperative complications according to  
44  
45 108 Clavien-Dindo Classification, the Comprehensive Complication Index, 30 and 90-day mortality, and  
46  
47 109 the Society of Interventional Radiology classification for adverse events.<sup>18-20</sup> Treatment effects will be  
48  
49 110 evaluated with additional questions regarding intervention indication, the effectiveness of the  
50  
51 111 treatment on symptoms, and the likeliness of patients to choose the treatment again. If surgical  
52  
53 112 intervention is applied, questions on incisional herniation are added to the questionnaire after  
54  
55 113 intervention. Supplementary questionnaires will be sent after interventions at three, six, and twelve  
56  
57  
58  
59  
60

1  
2  
3 114 months, thereafter resuming to biannual questionnaires. An example of two cases and their follow-  
4  
5 115 up with questionnaires is shown in figure 1.  
6

7 116 In addition to data collected from questionnaires, data will be extracted from local electronic  
8  
9 117 patient files. This includes the following data: 1) baseline patient characteristics (age, gender,  
10  
11 118 comorbidity); 2) tumour or cyst characteristics (among which diameter, imaging, and  
12  
13 119 histopathological examination), 3) certain data specific for the type of BLTC the patient was  
14  
15 120 diagnosed with, and 4) details on the intervention performed. Table 1 summarizes collected  
16  
17 121 variables. All tumour and cyst diameters will be measured according to RECISTv1.1 criteria.<sup>21</sup>  
18  
19 122

### 23 123 *Patient involvement and questionnaire selection*

24  
25 124 Various questionnaires have been used to evaluate PROs of patients with BLTCs. However, these  
26  
27 125 questionnaires were not developed for the evaluation of outcomes of BLTC patients and therefore  
28  
29 126 most likely do not appropriately measure outcomes relevant to patients with BLTCs. Based on  
30  
31 127 literature and focus groups with patients with BLTCs and their caregivers, we selected relevant  
32  
33 128 patient-reported outcomes (PROs). These were: insecurity/anxiety, pain, fatigue and limitations in  
34  
35 129 daily life. The domains anxiety, fatigue, ability to participate and pain interference will be evaluated  
36  
37 130 in the current study using computerized adaptive testing through the Dutch-Flemish Patient-  
38  
39 131 Reported Outcomes Measurement Information System (PROMIS).<sup>22-24</sup> PROMIS instruments have  
40  
41 132 recently successfully been used in research on various patient groups.<sup>25,26</sup> Additionally, numerical  
42  
43 133 rating scales for pain (current and most, least, and average pain over a week) and two general health  
44  
45 134 and quality of life questions will be assessed.  
46  
47  
48  
49

50 135

### 52 136 *Data collection*

53  
54 137 Data will be collected using electronic case report forms using an online based platform which  
55  
56 138 automatically generates patient identifiers consisting of the hospital code and a number. A subject  
57  
58 139 identification log will be kept in each center by the principal investigator or local coordinating  
59  
60

1  
2  
3 140 investigator. This subject identification log will contain the personal details which can be used to  
4  
5 141 send questionnaires to patients. Only this dedicated person has the key for decoding patient data. At  
6  
7 142 completion of the follow-up period, the database will be exported from the online platform. The  
8  
9 143 database will be hosted on a secure server with the infrastructure, configuration, and licenses that  
10  
11 144 are consistent with current norms and laws to ensure safe and secure data storage and processing.  
12  
13  
14  
15

145

#### 146 *Sample size and statistical analysis*

147 No sample size calculation was conducted as this is an observational cohort study. A previous  
148 single center prospective cohort study on the (conservative and surgical) treatment of HCAs and  
149 FNHs included 110 patients in 4.5 years.<sup>27</sup> This current study has a broader scope as it spans across at  
150 least seven medical centers, includes more BLTC types, and also includes patients treated by  
151 interventional radiological procedures. Therefore, the aim is to include at least 450 patients.

152 Statistical analyses will be performed using SPSS statistics for Windows version 24.0 (SPSS Inc.,  
153 Chicago, IL, USA) and R for Windows version 3.6.3 (R Core Team, Vienna, Austria). Categorical data  
154 will be presented as proportions. Continuous data will be presented as mean and standard deviation  
155 (SD) or median and interquartile range (IQR). Categorical variables will be compared using the Fisher  
156 exact test or the Chi-square test. Continuous variables will be compared using the Mann-Whitney U  
157 test or the Student's t-test. Cox proportional hazards model will be used when appropriate. A two-  
158 tailed  $P < 0.05$  will be considered statistically significant.

159 Scores for each patient-reported outcome measure at the start and end of follow-up will be  
160 compared using a paired t-test, and factors associated with significant gain in these measures will be  
161 evaluated. Patients will be stratified according to treatment strategy (conservative, surgical,  
162 transarterial (chemo-)embolization and lipiodolization, aspiration and sclerotherapy, or  
163 radiofrequency or microwave ablation). Sensitivity analyses will be performed for the type of BLTC,  
164 and for the time between questionnaires and hospital visits, as hospital visits and imaging may

1  
2  
3 165 increase the extent of the emotional burden experienced by patients. For surgically treated patients,  
4  
5 166 predictors of a complicated course (Clavien Dindo  $\geq 3b$ ) will also be evaluated.  
6

7  
8 167

9  
10 168 *Trial sites*

11  
12 169 Initiating centers are Amsterdam UMC and University Medical Center Groningen. At least all other  
13  
14 170 centers participating in the DBLTG will be included. Participating centers will at least include:

- 15  
16 171
- 17 1. Amsterdam University Medical Centers, Amsterdam, The Netherlands
  - 18 172 2. University Medical Center Groningen, Groningen, The Netherlands
  - 19 173 3. Erasmus Medical Center, Rotterdam, The Netherlands
  - 20 174 4. Maastricht University Medical Center+, Maastricht, The Netherlands
  - 21 175 5. Radboud University Medical Center, Nijmegen, The Netherlands
  - 22 176 6. Leiden University Medical Center, Leiden, The Netherlands

23  
24  
25  
26  
27  
28  
29  
30 177 In order to identify and/or avoid selection bias, non-DBLTG and non-academic centers will also be  
31  
32 178 enabled to join during the course of the study.  
33  
34  
35  
36  
37  
38  
39  
40  
41  
42  
43  
44  
45  
46  
47  
48  
49  
50  
51  
52  
53  
54  
55  
56  
57  
58  
59  
60

1  
2  
3 179 **Ethics and dissemination**

4  
5 180 *Ethical considerations*

6  
7 181 This trial will be conducted in accordance with the principles of the Declaration of Helsinki and as  
8  
9 182 stated in the laws governing human research and Good Clinical Practice. The study does not interfere  
10  
11 183 or change the process of treatment of the BLTCs in the included patients. The study was determined  
12  
13 184 to be beyond the scope of the Dutch law on research on human subjects (WMO) according to the  
14  
15 185 Medical Ethics Committee (MEC) of the Amsterdam UMC, location AMC (MEC AMC W19\_134 #  
16  
17 186 19.167) and the MEC of the University Medical Center Groningen (MEC UMCG 201900292). The  
18  
19 187 study will be evaluated by MECs of all participating centers. Moreover, the study will also be  
20  
21 188 reviewed according to local requirements of each center. Finally, the study proposal was reviewed by  
22  
23 189 the scientific committee of the DBLTG. All substantial amendments will be notified to these  
24  
25 190 committees and organizations. Data will be kept for at least fifteen years after study completion.  
26  
27  
28  
29

30 191

31  
32 192 *Informed consent and withdrawal of consent*

33  
34 193 Informed consent for use of the questionnaires and the data collected from the electronic patient  
35  
36 194 files will be obtained from all patients by the treating professional in participating centers.  
37  
38 195 Information will be provided to patients by physicians. This will consist of both printed folders and  
39  
40 196 links to digital information. A dedicated website has been created (URL:  
41  
42 197 <https://www.DBLTG.nl/BELIVER/>). Also, dedicated e-mailboxes have been constructed.  
43  
44

45 198 Patients can withdraw from study participation at any time and without consequences or reason.  
46  
47 199 With each questionnaire that is sent, it is noted that if patients wish to withdraw, they can do so at  
48  
49 200 any time. In case of withdrawal, patients will be contacted and asked for allowance of data analysis  
50  
51 201 until that point. There is no specific replacement of individual subjects after withdrawal. Patients  
52  
53 202 who have chosen to withdraw from the study will receive follow-up and treatment according to  
54  
55 203 current standard of care by their treating physician. If participants do not respond to questionnaires,  
56  
57  
58  
59  
60

1  
2  
3 204 a reminder will be sent after one month. If there is no reaction to this reminder, patients will be  
4  
5 205 contacted by telephone to verify if they still wish to participate or not.  
6

7  
8 206

9  
10 207 *Additional burden and risk associated with study participation*

11  
12 208 The proposed study does not interfere with standard patient care. No additional blood samples,  
13  
14 209 increase in number of hospital visits, physical examination or other tests are indicated. However, in  
15  
16 210 case of cessation of medical follow-up, patients included in the study will still receive questionnaires.  
17

18  
19 211 There are no direct benefits for patients participating in this study. There are no risks involved  
20  
21 212 with participating in this study. The additional burden of the study is considered to be minimal.  
22

23 213 Completion of the questionnaire will take approximately 15 minutes. The questionnaires might  
24  
25 214 remind patients of their BLTC diagnosis. Some of the questions might be confronting (i.e. questions  
26  
27 215 regarding the impact of complaints on daily life and work).  
28

29  
30 216

31  
32 217 *Administrative aspects, monitoring and publication*

33  
34 218 All results, either positive or negative, will be published in a peer-reviewed journal. All results will  
35  
36 219 be reported suiting reporting guidelines provided by the EQUATOR-network (URL:

37  
38 220 <https://www.equator-network.org/>). All Dutch centers collaborating in the DBLTG will be invited to  
39  
40 221 participate in this study. All results originating from this study will be published on behalf of the

41  
42 222 DBLTG. Co-authorship is available for one physician at each center supplying at least five cases and  
43  
44 223 for two physicians at each center supplying at least ten cases. In each center it may be decided

45  
46 224 individually which one or two physicians will be mentioned as co-authors. Co-authorships may also  
47  
48 225 be offered to persons who contributed substantially to the conceptualization and execution of the

49  
50 226 study. All co-authorships will have to fulfill the international committee of medical journal editors  
51  
52 227 (ICMJE) regulations.<sup>28</sup>  
53

54  
55 228 In addition to these co-authorships, others involved may be listed as collaborator and the journal  
56  
57 229 will be asked to list them as such also in MEDLINE/PubMed. For each center supplying at least thirty  
58  
59  
60

1  
2  
3  
4  
5  
6  
7  
8  
9  
10  
11  
12  
13  
14  
15  
16  
17  
18  
19  
20  
21  
22  
23  
24  
25  
26  
27  
28  
29  
30  
31  
32  
33  
34  
35  
36  
37  
38  
39  
40  
41  
42  
43  
44  
45  
46  
47  
48  
49  
50  
51  
52  
53  
54  
55  
56  
57  
58  
59  
60

230 cases, one collaborator may be included; for centers supplying at least forty cases, two collaborators;  
231 for centers supplying fifty or more cases, three collaborators.

For peer review only

1  
2  
3 **List of abbreviations**  
4  
5

6 BLTCs Benign liver tumours and cysts  
7

8 FNH Focal nodular hyperplasia  
9

10 HCA Hepatocellular adenoma  
11  
12

13 MEC Medical ethics committee  
14

15 PRO Patient reported outcome  
16

17 WMO Medical research involving human subjects act; in Dutch: wet medisch-wetenschappelijk  
18 onderzoek met mensen  
19  
20  
21  
22  
23  
24  
25  
26  
27  
28  
29  
30  
31  
32  
33  
34  
35  
36  
37  
38  
39  
40  
41  
42  
43  
44  
45  
46  
47  
48  
49  
50  
51  
52  
53  
54  
55  
56  
57  
58  
59  
60



## References

1. Cristiano A, Dietrich A, Spina JC, Ardiles V, de Santibañes E. Focal nodular hyperplasia and hepatic adenoma: Current diagnosis and management. *Updates Surg.* 2014;66(1):9-21. doi: 10.1007/s13304-013-0222-3
2. EASL clinical practice guidelines on the management of benign liver tumours. *J Hepatol.* 2016;65(2):386-98. doi: 10.1016/j.jhep.2016.04.001
3. Ishak KG, Rabin L. Benign tumours of the liver. *Med Clin North Am.* 1975;59(4):995-1013. doi: 10.1016/s0025-7125(16)31998-8
4. Karhunen PJ. Benign hepatic tumours and tumour like conditions in men. *J Clin Pathol.* 1986;39(2):183-8. doi: 10.1136/jcp.39.2.183
5. Carrim ZI, Murchison JT. The prevalence of simple renal and hepatic cysts detected by spiral computed tomography. *Clin Radiol.* 2003;58(8):626-9. doi: 10.1016/s0009-9260(03)00165-x
6. Charny CK, Jarnagin WR, Schwartz LH, Frommeyer HS, DeMatteo RP, Fong Y, et al. Management of 155 patients with benign liver tumours. *Br J Surg.* 2001;88(6):808-13. doi: 10.1046/j.0007-1323.2001.01771.x
7. Marrero JA, Ahn J, Rajender Reddy K. ACG clinical guideline: The diagnosis and management of focal liver lesions. *Am J Gastroenterol.* 2014;109(9):1328-47. doi: 10.1038/ajg.2014.213
8. Deneve JL, Pawlik TM, Cunningham S, Clary B, Reddy S, Scoggins CR, et al. Liver cell adenoma: A multicenter analysis of risk factors for rupture and malignancy. *Ann Surg Oncol.* 2009;16(3):640-8. doi: 10.1245/s10434-008-0275-6
9. Stoot JH, Coelen RJ, De Jong MC, Dejong CH. Malignant transformation of hepatocellular adenomas into hepatocellular carcinomas: A systematic review including more than 1600 adenoma cases. *HPB (Oxford).* 2010;12(8):509-22. doi: 10.1111/j.1477-2574.2010.00222.x
10. Kon AA. The shared decision-making continuum. *JAMA.* 2010;304(8):903-4. doi: 10.1001/jama.2010.1208

- 1  
2  
3 11. Higginson IJ, Carr AJ. Using quality of life measures in the clinical setting. *BMJ*.  
4  
5 2001;322(7297):1297-300. doi: 10.1136/bmj.322.7297.1297  
6
- 7 12. van Rosmalen BV, de Graeff JJ, van der Poel MJ, de Man IE, Besselink M, Abu Hilal M, et al.  
8  
9 Impact of open and minimally invasive resection of symptomatic solid benign liver tumours on  
10  
11 symptoms and quality of life: A systematic review. *HPB*. 2019;21(9):1119-30. doi:  
12  
13 <https://doi.org/10.1016/j.hpb.2019.02.022>  
14
- 15 13. Kamphues C, Engel S, Denecke T, Bova R, Hippler-Benscheidt M, Puhl G, et al. Safety of liver  
16  
17 resection and effect on quality of life in patients with benign hepatic disease: Single center  
18  
19 experience. *BMC Surg*. 2011;11:16. doi: 10.1186/1471-2482-11-16  
20  
21
- 22 14. Auer TA, Walter-Rittel T, Geisel D, Schöning W, Schmelzle M, Müller T, et al. HBP-enhancing  
23  
24 hepatocellular adenomas and how to discriminate them from FNH in Gd-EOB MRI. *BMC Med*  
25  
26 imaging. 2021;21(1):28. doi: 10.1186/s12880-021-00552-0  
27  
28
- 29 15. Bieze M, van den Esschert JW, Nio CY, Verheij J, Reitsma JB, Terpstra V, et al. Diagnostic accuracy  
30  
31 of MRI in differentiating hepatocellular adenoma from focal nodular hyperplasia: Prospective study  
32  
33 of the additional value of gadoxetate disodium. *AJR Am J Roentgenol*. 2012;199(1):26-34. doi:  
34  
35 [10.2214/ajr.11.7750](https://doi.org/10.2214/ajr.11.7750)  
36  
37
- 38 16. Mezhir JJ, Fourman LT, Do RK, Denton B, Allen PJ, D'Angelica MI, et al. Changes in the  
39  
40 management of benign liver tumours: An analysis of 285 patients. *HPB (Oxford)*. 2013;15(2):156-63.  
41  
42 doi: 10.1111/j.1477-2574.2012.00556.x  
43  
44
- 45 17. van Aerts RMM, Kievit W, de Jong ME, Ahn C, Bañales JM, Reiterová J, et al. Severity in polycystic  
46  
47 liver disease is associated with aetiology and female gender: Results of the International PLD registry.  
48  
49 *Liver Int*. 2019;39(3):575-82. doi: 10.1111/liv.13965  
50  
51
- 52 18. Khalilzadeh O, Baerlocher MO, Shyn PB, Connolly BL, Devane AM, Morris CS, et al. Proposal of a  
53  
54 new adverse event classification by the Society of Interventional Radiology standards of practice  
55  
56 committee. *J Vasc Interv Radiol*. 2017;28(10):1432-7.e3. doi: 10.1016/j.jvir.2017.06.019  
57  
58  
59  
60

- 1  
2  
3 19. Dindo D, Demartines N, Clavien P. Classification of surgical complications: A new proposal with  
4  
5 evaluation in a cohort of 6336 patients and results of a survey. *Ann Surg.* 2004;240(2):205-13. doi:  
6  
7 10.1097/01.sla.0000133083.54934.ae  
8  
9  
10 20. Slankamenac K, Graf R, Barkun J, Puhan MA, Clavien P. The comprehensive complication index: A  
11  
12 novel continuous scale to measure surgical morbidity. *Ann Surg.* 2013;258(1):1-7. doi:  
13  
14 10.1097/SLA.0b013e318296c732  
15  
16 21. Eisenhauer EA, Therasse P, Bogaerts J, Schwartz LH, Sargent D, Ford R, et al. New response  
17  
18 evaluation criteria in solid tumours: Revised RECIST guideline (version 1.1). *Eur J cancer.*  
19  
20 2009;45(2):228-47. doi: 10.1016/j.ejca.2008.10.026  
21  
22  
23 22. Alonso J, Bartlett SJ, Rose M, Aaronson NK, Chaplin JE, Efficace F, et al. The case for an  
24  
25 international patient-reported outcomes measurement information system (PROMIS®) initiative.  
26  
27 *Health Qual Life Outcomes.* 2013;11:210. doi: 10.1186/1477-7525-11-210  
28  
29  
30 23. Terwee CB, Roorda LD, de Vet HC, Dekker J, Westhovens R, van Leeuwen J, et al. Dutch-Flemish  
31  
32 translation of 17 item banks from the patient-reported outcomes measurement information system  
33  
34 (PROMIS). *Qual Life Res.* 2014;23(6):1733-41. doi: 10.1007/s11136-013-0611-6  
35  
36  
37 24. Cella D, Riley W, Stone A, Rothrock N, Reeve B, Yount S, et al. The Patient-Reported Outcomes  
38  
39 easurement Information System (PROMIS) developed and tested its first wave of adult self-reported  
40  
41 health outcome item banks: 2005–2008. *J Clin Epidemiol.* 2010;63(11):1179-94. doi:  
42  
43 10.1016/j.jclinepi.2010.04.011  
44  
45  
46 25. van der Meij E, Anema JR, Leclercq WKG, Bongers MY, Consten ECJ, Schraffordt Koops SE, et al.  
47  
48 Personalised perioperative care by e-health after intermediate-grade abdominal surgery: A  
49  
50 multicentre, single-blind, randomised, placebo-controlled trial. *Lancet.* 2018;392(10141):51-9. doi:  
51  
52 10.1016/s0140-6736(18)31113-9  
53  
54  
55 26. Wesselius HM, van den Ende ES, Alsmas J, ter Maaten JC, Schuit SCE, Stassen PM, et al. Quality  
56  
57 and quantity of sleep and factors associated with sleep disturbance in hospitalized patients. *JAMA*  
58  
59 *Intern Med.* 2018;178(9):1201-8. doi: 10.1001/jamainternmed.2018.2669  
60

1  
2  
3 27. Bieze M, Busch OR, Tanis PJ, Verheij J, Phoa SS, Gouma DJ, et al. Outcomes of liver resection in  
4 hepatocellular adenoma and focal nodular hyperplasia. HPB (Oxford). 2014;16(2):140-9. doi:  
5  
6 10.1111/hpb.12087  
7  
8

9  
10 28. ICMJE Recommendations for the conduct, reporting, editing, and publication of scholarly work in  
11 medical journals. Updated December 2014. Available at [http://www.icmje.org/icmje-](http://www.icmje.org/icmje-recommendations.pdf)  
12  
13  
14  
15  
16  
17  
18  
19  
20  
21  
22  
23  
24  
25  
26  
27  
28  
29  
30  
31  
32  
33  
34  
35  
36  
37  
38  
39  
40  
41  
42  
43  
44  
45  
46  
47  
48  
49  
50  
51  
52  
53  
54  
55  
56  
57  
58  
59  
60

1  
2  
3 **Declarations**  
4

5 *Authors' contributions*  
6

7 AF, MPDH, VEdM, JIE: conceptualization and drafting of the manuscript, study coordinators  
8

9 BVvR, AJK, MGB, RAdM, JNMIIJ, MGJT, MK, MMEC, MET, AEB, RJdH, EWD, GK, OMvD, JV, RBT, FJCC:  
10  
11 conceptualization of the manuscript and revision of the manuscript  
12  
13

14 All collaborating authors approved the final manuscript.  
15  
16

17  
18  
19 *Funding statement*  
20

21 This work was supported by a grant from the Dutch Society of Gastroenterology (Nederlandse  
22  
23 Vereniging voor Gastroenterologie) to the Dutch Benign Liver Tumour Group, and by a personal grant  
24  
25 from Amsterdam UMC location AMC to A. Furumaya  
26  
27

28  
29  
30 *Competing interests*  
31

32 The authors declare that they have no competing interests.  
33  
34

35  
36 *Word count: 2754/4000 words*  
37  
38  
39  
40  
41  
42  
43  
44  
45  
46  
47  
48  
49  
50  
51  
52  
53  
54  
55  
56  
57  
58  
59  
60

## Acknowledgements

Collaborating authors on behalf of the Dutch Benign Liver Tumour Group (DBLTG)

- Isabelle D. Munsterman, Department of Gastroenterology and Hepatology, Radboud UMC, Radboud University, Nijmegen, The Netherlands
- Sandjai Ramsoekh, Department of Gastroenterology and Hepatology, Amsterdam Gastroenterology Endocrinology Metabolism, Amsterdam UMC, Vrije Universiteit, The Netherlands
- Michael D. Doukas, Department of Pathology, Erasmus MC, Erasmus University Rotterdam, Rotterdam, The Netherlands
- Jan C. Beckervordersandforth, Department of Pathology, Maastricht University Medical Center+, Maastricht University, Maastricht, The Netherlands
- Christiaan van der Leij, Department of Radiology, Maastricht University Medical Center+, Maastricht University, Maastricht, The Netherlands
- Razvan Miclea, Department of Radiology, Maastricht University Medical Center+, Maastricht University, Maastricht, The Netherlands
- Eric T.T.L. Tjwa, Department of Gastroenterology and Hepatology, Radboud UMC, Radboud University, Nijmegen, The Netherlands
- Peter B. van den Boezem, Department of Surgery, Radboud UMC, Radboud University, Nijmegen, The Netherlands
- Hans H.W. de Wilt, Department of Surgery, Radboud UMC, Radboud University, Nijmegen, The Netherlands

- 1  
2  
3 • Sebastiaan van Koeverden, Department of Radiology, Radboud UMC, Radboud University,  
4 Nijmegen, The Netherlands  
5  
6  
7
- 8 • Andries E. Braat, Department of Surgery, Leiden UMC, Leiden University, The Netherlands  
9  
10
- 11 • Minneke J. Coenraad, Department of Gastroenterology and Hepatology, Leiden UMC,  
12 Leiden University, Leiden, The Netherlands  
13  
14  
15
- 16 • Stijn S.L.P. Crobach, Department of Pathology, Leiden UMC, Leiden University, The  
17 Netherlands  
18  
19  
20  
21  
22
- 23 • Shirin Feshtali, Department of Radiology, Leiden UMC, Leiden University, Leiden, The  
24 Netherlands  
25  
26  
27
- 28 • Mark C. Burgmans, Department of Radiology, Leiden UMC, Leiden University, Leiden, The  
29 Netherlands  
30  
31  
32  
33
- 34 • Koert P. de Jong, Department of Surgery, University Medical Center Groningen, University  
35 of Groningen, Groningen, The Netherlands  
36  
37  
38
- 39 • Thomas M. van Gulik, Department of Surgery, Amsterdam Gastroenterology  
40 Endocrinology Metabolism, Amsterdam UMC, University of Amsterdam, The Netherlands  
41  
42  
43  
44
- 45 • Rutger-Jan Swijnenburg, Department of Surgery, Amsterdam Gastroenterology  
46 Endocrinology Metabolism, University of Amsterdam, The Netherlands  
47  
48  
49  
50  
51  
52  
53  
54  
55  
56  
57  
58  
59  
60

## Figures

Figure title: Figure 1

Figure legend: An overview of the hospital visits and study questionnaires of two fictional patients included in the study are shown. In general, patients receive a questionnaire every six months. Deviations from this normal course of follow-up caused by patients undergoing an intervention are indicated by red questionnaires. Please note that these two patients were included around similar dates, but total follow-up durations might differ between patients depending on the date of inclusion.



Table 1 Overview of recorded variables

| Baseline information                                     |                                                                                | Tumour or cyst specific questions |                      | Treatment characteristics   |                                                                                                          |                                                                                                          |
|----------------------------------------------------------|--------------------------------------------------------------------------------|-----------------------------------|----------------------|-----------------------------|----------------------------------------------------------------------------------------------------------|----------------------------------------------------------------------------------------------------------|
| Patient characteristics                                  | Tumour/cyst characteristics*                                                   | Solid lesions                     | Cystic lesions       | Intervention                | Surgery                                                                                                  | Interventional radiology                                                                                 |
| Age                                                      | Total number of lesions at baseline                                            | Focal nodular hyperplasia         | Simple hepatic cysts | Date of intervention        | Type of approach (open, laparoscopic, robot)                                                             | Type of procedure (aspiration sclerotherapy, TAE, RFA/MWA)                                               |
| Sex                                                      | Location of lesion (left hemiliver, right hemiliver, bilobar)                  | Hemangioma                        |                      | Duration of hospital stay   | Occurrence and reason for conversion                                                                     | Sclerotherapy (volume of aspiration, length of sclerosing, type of sclerosing agent)                     |
| Mortality<br>If yes, reason                              | Type of lesion                                                                 | Hepatocellular adenoma            |                      | Operation or procedure time | Type of procedure (fenestration, wedge resection, segmental resection, hemihepatectomy, transplantation) | TAE (volume and type of embolization agent [simple embolization, chemo-embolization or lipiodolization]) |
| Comorbidity (ASA score and Elixhauser comorbidity index) | Diameter, date and modality of diagnosis                                       |                                   |                      | 30-day and 90-day mortality | Specification of resected segments                                                                       |                                                                                                          |
|                                                          | Diameter, date and modality of follow-up                                       |                                   |                      |                             | Amount of blood loss                                                                                     |                                                                                                          |
|                                                          | Occurrence of misdiagnosis<br>If so, revised diagnosis and diagnostic modality |                                   |                      |                             | Additional procedures (e.g. argon beam coagulation, omental transposition, concurring cholecystectomy)   |                                                                                                          |
|                                                          | Histopathological diagnosis with immunohistochemistry if available             |                                   |                      |                             | Complications (type, CD, CCI & SIR)                                                                      |                                                                                                          |

Abbreviations: ASA: American society of anesthesiologists; TAE, transarterial embolization; RFA, radiofrequency ablation; MWA, microwave ablation; CD, Clavien-Dindo; CCI, comprehensive complication index; SIR, society of interventional radiologists classification for adverse events.\* According to RECISTv1.1 criteria, lesions will only be measured on CT or MRI (longest diameter), measured on the transversal plane on post-contrast series. Maximum of two lesions. If the target lesion is not visible on follow-up imaging (index imaging is imaging shortest before inclusion), then the diameter of the next largest tumour will be measured.

1  
2  
3  
4  
5  
6  
7  
8  
9  
10  
11  
12  
13  
14  
15  
16  
17  
18  
19  
20  
21  
22  
23  
24  
25  
26  
27  
28  
29  
30  
31  
32  
33  
34  
35  
36

**Example patient A**

Hospital visits

Inclusion

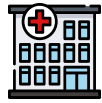

Visit

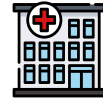

BMJ Open Visit

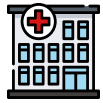

End of follow-up

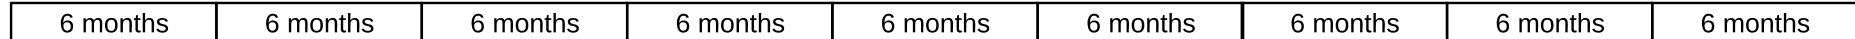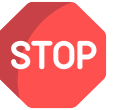

Study questionnaires

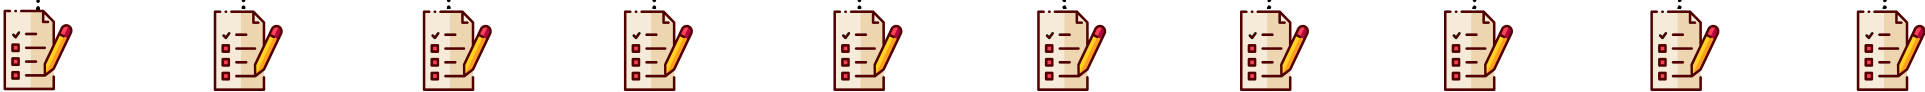

**Example patient B**

Hospital visits

Inclusion

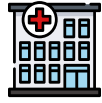

Visit, intervention planned

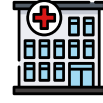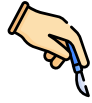

Visit

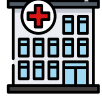

Visit

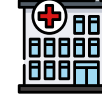

End of follow-up

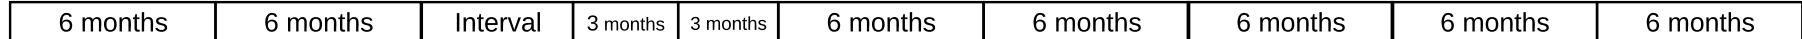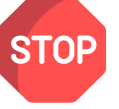

Study questionnaires

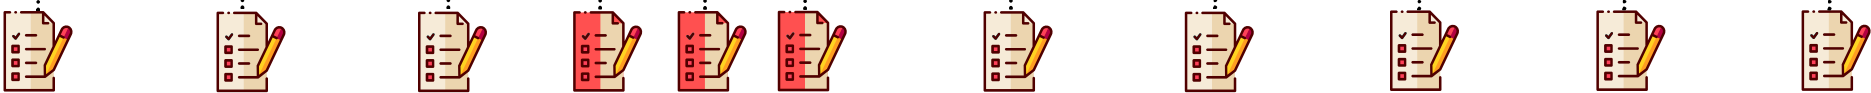

**Legend**

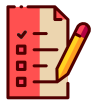

Deviation from regular follow-up after an intervention (surgery or interventional radiology), after which follow-up frequency is temporarily increased.

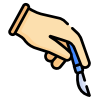

Intervention: surgery or interventional radiology.

# BMJ Open

## Study protocol for a multicenter nationwide prospective cohort study to investigate the natural course and clinical outcome in benign liver tumors and cysts in the Netherlands: the BELIVER study

|                               |                                                                                                                                                                                                                                                                                                                                                                                                                                                                                                                                                                                                                                                                                                                                                                                                                                                                                                                                                                                                                                                                                                                                                                                                                                                                                                                                                                                                                                                                                                                                                                                                                                                                                                                                                                                                                                                                                                                                                                                                                                                                                                                                                                                                                                  |
|-------------------------------|----------------------------------------------------------------------------------------------------------------------------------------------------------------------------------------------------------------------------------------------------------------------------------------------------------------------------------------------------------------------------------------------------------------------------------------------------------------------------------------------------------------------------------------------------------------------------------------------------------------------------------------------------------------------------------------------------------------------------------------------------------------------------------------------------------------------------------------------------------------------------------------------------------------------------------------------------------------------------------------------------------------------------------------------------------------------------------------------------------------------------------------------------------------------------------------------------------------------------------------------------------------------------------------------------------------------------------------------------------------------------------------------------------------------------------------------------------------------------------------------------------------------------------------------------------------------------------------------------------------------------------------------------------------------------------------------------------------------------------------------------------------------------------------------------------------------------------------------------------------------------------------------------------------------------------------------------------------------------------------------------------------------------------------------------------------------------------------------------------------------------------------------------------------------------------------------------------------------------------|
| Journal:                      | <i>BMJ Open</i>                                                                                                                                                                                                                                                                                                                                                                                                                                                                                                                                                                                                                                                                                                                                                                                                                                                                                                                                                                                                                                                                                                                                                                                                                                                                                                                                                                                                                                                                                                                                                                                                                                                                                                                                                                                                                                                                                                                                                                                                                                                                                                                                                                                                                  |
| Manuscript ID                 | bmjopen-2021-055104.R1                                                                                                                                                                                                                                                                                                                                                                                                                                                                                                                                                                                                                                                                                                                                                                                                                                                                                                                                                                                                                                                                                                                                                                                                                                                                                                                                                                                                                                                                                                                                                                                                                                                                                                                                                                                                                                                                                                                                                                                                                                                                                                                                                                                                           |
| Article Type:                 | Protocol                                                                                                                                                                                                                                                                                                                                                                                                                                                                                                                                                                                                                                                                                                                                                                                                                                                                                                                                                                                                                                                                                                                                                                                                                                                                                                                                                                                                                                                                                                                                                                                                                                                                                                                                                                                                                                                                                                                                                                                                                                                                                                                                                                                                                         |
| Date Submitted by the Author: | 27-Mar-2022                                                                                                                                                                                                                                                                                                                                                                                                                                                                                                                                                                                                                                                                                                                                                                                                                                                                                                                                                                                                                                                                                                                                                                                                                                                                                                                                                                                                                                                                                                                                                                                                                                                                                                                                                                                                                                                                                                                                                                                                                                                                                                                                                                                                                      |
| Complete List of Authors:     | <p>Furumaya, Alicia; Amsterdam University Medical Centres, Department of Surgery; University of Amsterdam<br/> Haring, Martijn; University Medical Centre Groningen, Department of Surgery; University of Groningen<br/> van Rosmalen, Belle; Amsterdam University Medical Centres, Department of Surgery; University of Amsterdam<br/> Klompshouwer, Anne; Erasmus Medical Center, Department of Surgery; Erasmus University Rotterdam<br/> Besselink, Marc; Amsterdam University Medical Centres, Department of Surgery; University of Amsterdam<br/> de Man, Robert; Erasmus Medical Center, Department of Gastroenterology and Hepatology; Erasmus University Rotterdam<br/> IJzermans, Jan; Erasmus Medical Center, Department of Surgery; Erasmus University Rotterdam<br/> Thomeer, Maarten; Erasmus Medical Center, Department of Radiology; Erasmus University Rotterdam<br/> Kramer, Matthijs; Maastricht University Medical Centre+, Department of Gastroenterology and Hepatology; Maastricht University<br/> Coolen, Mariëlle; Maastricht University Medical Centre+, Department of Surgery; Maastricht University<br/> Tushuizen, Maarten; Leiden University Medical Center, Department of Gastroenterology and Hepatology; Leiden University<br/> Schaapherder, A.F.M.; Leiden University Medical Center, Department of Surgery; Leiden University<br/> de Haas, Robbert; University Medical Centre Groningen, Department of Radiology; University of Groningen<br/> Duiker, Evelien; University Medical Centre Groningen, Department of Pathology and Medical Biology; University of Groningen<br/> Kazemier, Geert; Amsterdam University Medical Centres, Department of Surgery; Vrije Universiteit Amsterdam<br/> van Delden, Otto; Amsterdam University Medical Centres, Department of Radiology; University of Amsterdam<br/> Verheij, Joanne; Amsterdam University Medical Centres, Department of Pathology; University of Amsterdam<br/> Takkenberg, R.; Amsterdam University Medical Centres, Department of Gastroenterology and Hepatology; University of Amsterdam<br/> Cuperus, Frans; University Medical Centre Groningen, Department of Gastroenterology and Hepatology; University of Groningen</p> |

|                                  |                                                                                                                                                                                                                 |
|----------------------------------|-----------------------------------------------------------------------------------------------------------------------------------------------------------------------------------------------------------------|
|                                  | De Meijer, Vincent; University Medical Centre Groningen, Department of Surgery; University of Groningen<br>Erdmann, Joris; Amsterdam University Medical Centres, Department of Surgery; University of Amsterdam |
| <b>Primary Subject Heading</b> : | Gastroenterology and hepatology                                                                                                                                                                                 |
| Secondary Subject Heading:       | Patient-centred medicine, Radiology and imaging, Surgery                                                                                                                                                        |
| Keywords:                        | Hepatobiliary surgery < SURGERY, Hepatobiliary tumours < ONCOLOGY, Hepatobiliary disease < GASTROENTEROLOGY                                                                                                     |
|                                  |                                                                                                                                                                                                                 |

SCHOLARONE™  
Manuscripts

1  
2  
3  
4  
5  
6  
7  
8  
9  
10  
11  
12  
13  
14

## Study protocol for a multicenter nationwide prospective cohort study to investigate the natural course and clinical outcome in benign liver tumors and cysts in the Netherlands: the BELIVER study

Alicia Furumaya\*<sup>1</sup>, Martijn P.D. Haring\*<sup>2</sup>, Belle V. van Rosmalen<sup>1</sup>, Anne J. Klompenhouwer<sup>3</sup>, Marc G. Besselink<sup>1</sup>, Robert A. de Man<sup>4</sup>, Jan N.M. IJzermans<sup>3</sup>, Maarten G.J. Thomeer<sup>5</sup>, Matthijs Kramer<sup>6</sup>, Mariëlle M.E. Coolen<sup>7</sup>, Maarten E. Tushuizen<sup>8</sup>, Alexander F. Schaapherder<sup>9</sup>, Robbert J. de Haas<sup>10</sup>, Evelien W. Duiker<sup>11</sup>, Geert Kazemier<sup>12</sup>, Otto M. van Delden<sup>13</sup>, Joanne Verheij<sup>14</sup>, R. Bart Takkenberg<sup>15</sup>, Frans J.C. Cuperus<sup>16</sup>, Vincent E. de Meijer<sup>2#</sup>, Joris I. Erdmann<sup>1#</sup>; Dutch Benign Liver Tumor Group (DBLTG)

15 \* Shared first authorship

16 # Shared senior authorship

- 17  
18  
19  
20  
21  
22  
23  
24  
25  
26  
27  
28  
29  
30  
31  
32  
33  
34  
35  
36  
37  
38  
39  
40  
41  
42  
43  
44
- 1 Department of Surgery, Amsterdam Gastroenterology Endocrinology Metabolism, Amsterdam UMC, University of Amsterdam, The Netherlands
  - 2 Department of Surgery, University Medical Center Groningen, University of Groningen, Groningen, The Netherlands
  - 3 Department of Surgery, Erasmus MC, Erasmus University Rotterdam, Rotterdam, The Netherlands
  - 4 Department of Gastroenterology and Hepatology, Erasmus MC, Erasmus University Rotterdam, Rotterdam, The Netherlands
  - 5 Department of Radiology, Erasmus MC, Erasmus University Rotterdam, Rotterdam, The Netherlands
  - 6 Department of Gastroenterology and Hepatology, Maastricht University Medical Center+, Maastricht University, Maastricht, The Netherlands
  - 7 Department of Surgery, Maastricht University Medical Center+, Maastricht University, Maastricht, The Netherlands
  - 8 Department of Gastroenterology and Hepatology, Leiden UMC, Leiden University, Leiden, The Netherlands
  - 9 Department of Surgery, Leiden UMC, Leiden University, The Netherlands
  - 10 Department of Radiology, University Medical Center Groningen, University of Groningen, Groningen, The Netherlands
  - 11 Department of Pathology and Medical Biology, University Medical Center Groningen, University of Groningen, Groningen, The Netherlands
  - 12 Department of Surgery, Amsterdam Gastroenterology Endocrinology Metabolism, Amsterdam UMC, Vrije Universiteit, The Netherlands
  - 13 Department of Radiology, Amsterdam Gastroenterology Endocrinology Metabolism, Amsterdam UMC, University of Amsterdam, The Netherlands
  - 14 Department of Pathology, Amsterdam Gastroenterology Endocrinology Metabolism, Amsterdam UMC, University of Amsterdam, The Netherlands
  - 15 Department of Gastroenterology and Hepatology, Amsterdam Gastroenterology Endocrinology Metabolism, Amsterdam UMC, University of Amsterdam, The Netherlands
  - 16 Department of Gastroenterology and Hepatology, University Medical Center Groningen, University of Groningen, The Netherlands

45 **#Correspondence to:**

46 Vincent E. de Meijer

47 Department of Surgery

48 UMCG, University of Groningen, The Netherlands

49 Email: v.e.de.meijer@umcg.nl

Joris I. Erdmann

Department of Surgery,

Amsterdam UMC, University of Amsterdam, The Netherlands

Email: j.i.erdmann@amsterdamumc.nl

51 **Key words:** Benign Liver Tumours and Cysts, Patient Reported Outcomes, Surgery, Interventional Radiology, Study Protocol

52  
53  
54  
55  
56  
57  
58  
59  
60

1  
2  
3 **1 Abstract**

4  
5 **2 Introduction:** Benign liver tumours and cysts (BLTCs) comprise a heterogeneous group of cystic and  
6  
7 solid lesions, including hepatic hemangioma, focal nodular hyperplasia and hepatocellular adenoma.  
8  
9 Some BLTCs, for example (large) hepatocellular adenoma, are at risk of complications. Incidence of  
10  
11 malignant degeneration or hemorrhage is low in most other BLTCs. Nevertheless, the diagnosis BLTC  
12  
13 may carry a substantial burden and patients may be symptomatic, necessitating treatment. The  
14  
15 indications for interventions remain matter of debate. The primary study aim is to investigate patient  
16  
17 reported outcomes (PROs) of patients with BLTCs, with special regard to the influence of invasive  
18  
19 treatment as compared to the natural course of the disease.  
20  
21  
22

23 **10 Methods and analysis:** A nationwide observational cohort study of BLTC patients will be performed  
24  
25 between October 2021 and October 2026, the minimal follow-up will be two years. During  
26  
27 surveillance, a questionnaire regarding symptoms and their impact will be sent to participants on a  
28  
29 biannual basis and more often in case of invasive intervention. The questionnaire was previously  
30  
31 developed based on patient reported outcomes (PROs) considered relevant to patients with BLTCs  
32  
33 and their caregivers. Most questionnaires will be administered by computerized adaptive testing  
34  
35 through the Patient-Reported Outcomes Measurement Information System (PROMIS). Data, such as  
36  
37 treatment outcomes, will be extracted from electronic patient files. Multivariable analysis will be  
38  
39 performed to identify patient and tumour characteristics associated with significant improvement in  
40  
41 PROs or a complicated postoperative course.  
42  
43  
44

45 **20 Ethics and dissemination:** The study was assessed by the Medical Ethics Committee of the University  
46  
47 Medical Center Groningen and the Amsterdam UMC. Local consultants will provide information and  
48  
49 informed consent will be asked of all patients. Results will be published in a peer-reviewed journal.  
50  
51

52 **23 Study registration:** Netherlands Trial Register - NL8231 - 10-12-2019  
53  
54  
55  
56  
57  
58  
59  
60

1  
2  
3 24 **Strengths and limitations of this study**  
4

- 5 25 • The BELIVER-study will lead to an expansion of the current knowledge on patient reported  
6  
7 26 outcomes (PROs) in patients with benign liver tumours and cysts (BLTCs) in the  
8  
9 27 Netherlands and the influence of interventions hereupon  
10  
11  
12 28 • The long-term, biannual follow-up and increased frequency of questionnaires  
13  
14 29 postoperatively will provide data to enable professionals to better inform patients what  
15  
16 30 to expect and to enable patients and professionals to make well-informed treatment  
17  
18 31 decisions together  
19  
20  
21 32 • As the study is conducted nationwide, the extent of medical practice variation regarding  
22  
23 33 management of BLTCs can be assessed  
24  
25 34 • Questionnaires are continued even after cessation of medical follow-up, which may  
26  
27 35 introduce disease burden but may just as well be a confirmation of wellbeing for patients  
28  
29  
30 36 • Patient burden is minimized through use of questionnaires using computerized adaptive  
31  
32 37 testing  
33  
34  
35  
36  
37  
38  
39  
40  
41  
42  
43  
44  
45  
46  
47  
48  
49  
50  
51  
52  
53  
54  
55  
56  
57  
58  
59  
60

## 38 Introduction

39 Benign liver tumours and cysts (BLTCs) comprise a heterogeneous groups of cystic and solid  
40 lesions.<sup>1</sup> Although extensive research has been performed in the field of BLTCs, their natural course  
41 including their influence on patient reported outcomes (PROs) has been underexposed. The most  
42 common and relevant cystic lesions are simple non-parasitic liver cysts (estimated incidence of 18%)  
43 and “cystadenomas” (1-5% of all liver cysts),<sup>2</sup> now referred to as mucinous cystic lesions of the liver  
44 and biliary system and intraductal papillary neoplasms of the liver and bile ducts, MCNs and IPNBs).  
45 Solid lesions include hepatic hemangioma (0.4-20%), focal nodular hyperplasia (FNH, 0.4-3%), and  
46 hepatocellular adenoma (HCA, 0.001-0.004%).<sup>3-6</sup>

47 Many BLTCs are found incidentally on routine imaging for unrelated pathology.<sup>3,7</sup> The rising  
48 incidence of those so called incidentalomas is at least partly attributable to the increasing use of non-  
49 invasive imaging modalities.<sup>2</sup> Main complications of BLTCs are bleeding and malignant  
50 transformation - both of which rarely occur.<sup>8,9</sup> Of the five most common and relevant solid and cystic  
51 lesions, only (large) HCAs and “cystadenomas” have a known risk of malignant transformation.<sup>9</sup>  
52 Treatment indications remain an important matter of debate. In general, treatment of BLTCs is only  
53 recommended when they either have a risk of complications or cause severe complaints often with  
54 associated impairment of quality of life. When little or no risk of complications is present, the latter is  
55 often the sole indication for treatment.<sup>3</sup>

56 However, this recommendation has various nuances which hampers shared decision and makes  
57 the management of BLTCs exceptionally prone to undesirable practice variation.<sup>10,11</sup> Firstly, the  
58 influence of treatment on PROs is important but rarely reported.<sup>12</sup> Secondly, in current literature,  
59 PROs after treatment by surgery or interventional radiology are rarely compared with conservative  
60 management.<sup>12,13</sup> Finally, variations in diagnostic methods may be present, for example FNH is easily  
61 misdiagnosed as HCA when inadequate diagnostics are applied.<sup>3,14,15</sup>

62 Therefore, this observational cohort study aims to investigate the PROs of patients with BLTCs  
63 during their natural courses as well as after treatment. These data will enable patients and



1  
2  
3 64 professionals to make well-informed treatment decisions together to optimize value-based  
4  
5 65 outcomes. In addition, the study will provide an overview of the clinical practice in the Netherlands.  
6  
7  
8  
9  
10  
11  
12  
13  
14  
15  
16  
17  
18  
19  
20  
21  
22  
23  
24  
25  
26  
27  
28  
29  
30  
31  
32  
33  
34  
35  
36  
37  
38  
39  
40  
41  
42  
43  
44  
45  
46  
47  
48  
49  
50  
51  
52  
53  
54  
55  
56  
57  
58  
59  
60

For peer review only

## 66 **Methods and analysis**

### 67 *Study design*

68 The BELIVER study (Natural Course and Clinical Outcome in BEnign LIVER Tumours and Cysts) is an  
69 investigator-initiated, nationwide, multicenter observational cohort study. All Dutch medical centers  
70 treating patients with BLTCs are eligible for participation, facilitated and coordinated through the  
71 Dutch Benign Liver Tumor Group (DBLTG) network. The study was registered in the Netherlands Trial  
72 Register (NTR NL8231). Reporting of the study protocol and, eventually, of the full study is done  
73 according to the STROBE statement (Supplemental File 1)

74

### 75 *Study population*

76 Adult patients ( $\geq 18$  years old) presenting with a common and/or clinically relevant BLTC at  
77 participating centers are eligible for inclusion. Clinically relevant BLTCs are defined as all BLTCs  
78 potentially eligible for either surgical intervention or follow-up. Strict cut-off values regarding BLTC  
79 size will not be defined and are assessed on a per patient basis by treating professionals.

80 The study will be conducted from October 2021 till October 2026, . the minimal follow-up will be  
81 two years. Patients diagnosed with an uncommon BLTC, unwilling or unable to provide written  
82 informed consent or to fill in the questionnaire and patients with another disease substantially  
83 affecting PROs will be excluded. Uncommon BLTCs and clinically less relevant are excluded. These  
84 include choledochal cysts, hepatic angiomyolipoma and biliary hamartoma / Von Meyenburg  
85 complexes.<sup>16</sup> Additionally, patients with polycystic liver disease are excluded as they form a  
86 circumscribed group of patients with very typical symptoms and treatments, including liver  
87 transplantation and they are currently already included in another international study.<sup>17</sup>

88

### 89 *Study objectives and outcomes*

90 The primary study objective is to systematically record the PROs during the natural course and  
91 after (minimally) invasive treatment of patients with BLTCs. Secondary study objectives are to

1  
2  
3 92 evaluate changes in tumour/cyst diameter and the occurrence of any mortality and complications,  
4  
5 93 related to either the natural course of the disease (malignant transformation or hemorrhage) or  
6  
7 94 related to tumour or cyst treatment. The study will also provide an overview of potential variation in  
8  
9  
10 95 management and outcomes of Dutch patients with BLTCs.

11  
12 96 The primary study outcome measure is change in PROs including severity of symptoms from the  
13  
14 97 start compared to the end of the follow-up period. Symptoms are measured by a questionnaire,  
15  
16 98 focusing on PROs relevant to patients with BLTCs and their caregivers and partly administered  
17  
18  
19 99 through the Patient-Reported Outcomes Measurement Information System (PROMIS).

20  
21 100 The questionnaire is administered biannually. Although a multiplicity would have enabled a more  
22  
23 101 accurate longitudinal study with correction for confounding events, increasing questionnaire  
24  
25 102 frequency will also probably lead to a reduction of study adherence and result in an increased patient  
26  
27  
28 103 burden. Moreover, one might argue that continuing surveys even after cessation of medical follow-  
29  
30 104 up may introduce disease burden that remind patients of their diagnosis. However, the biannual  
31  
32 105 questionnaires may just as well be a confirmation of wellbeing for patients. In addition, currently  
33  
34 106 some patients might be subjected to extended periods of follow-up even in the absence of this study  
35  
36  
37 107 as a consequence of practice variation.

38  
39 108 Secondary outcomes related to interventions include: postoperative complications according to  
40  
41 109 Clavien-Dindo Classification, the Comprehensive Complication Index, 30 and 90-day mortality, and  
42  
43 110 the Society of Interventional Radiology classification for adverse events.<sup>18-20</sup> Treatment effects will be  
44  
45 111 evaluated with additional questions regarding intervention indication, the effectiveness of the  
46  
47  
48 112 treatment on symptoms, and the likeliness of patients to choose the treatment again. If surgical  
49  
50 113 intervention is applied, questions on incisional herniation are added to the questionnaire after  
51  
52 114 intervention. Supplementary questionnaires will be sent after interventions at three, six, and twelve  
53  
54 115 months, thereafter resuming to biannual questionnaires. An example of two cases and their follow-  
55  
56  
57 116 up with questionnaires is shown in figure 1.

1  
2  
3 117 In addition to data collected from questionnaires, data will be extracted from local electronic  
4  
5 118 patient files. This includes the following data: 1) baseline patient characteristics (age, gender,  
6  
7 119 comorbidity); 2) tumour or cyst characteristics (among which diameter, imaging, and  
8  
9 120 histopathological examination), 3) certain data specific for the type of BLTC the patient was  
10  
11 121 diagnosed with, and 4) details on the intervention performed. Table 1 summarizes collected  
12  
13 122 variables. All tumour and cyst diameters will be measured according to RECISTv1.1 criteria.<sup>21</sup>  
14  
15  
16  
17 123

#### 18 124 *Patient involvement and questionnaire selection*

19  
20  
21 125 Various questionnaires have been used to evaluate PROs of patients with BLTCs. However, these  
22  
23 126 questionnaires were not developed for the evaluation of outcomes of BLTC patients and therefore  
24  
25 127 most likely do not appropriately measure outcomes relevant to patients with BLTCs. Based on  
26  
27 128 literature and focus groups with patients with BLTCs and their caregivers, we selected relevant  
28  
29 129 patient-reported outcomes (PROs). These were: insecurity/anxiety, pain, fatigue and limitations in  
30  
31 130 daily life. The domains anxiety, fatigue, ability to participate and pain interference will be evaluated  
32  
33 131 in the current study using computerized adaptive testing through the Dutch-Flemish Patient-  
34  
35 132 Reported Outcomes Measurement Information System (PROMIS).<sup>22-24</sup> PROMIS instruments have  
36  
37 133 recently successfully been used in research on various patient groups.<sup>25, 26</sup> Additionally, numerical  
38  
39 134 rating scales for pain (current and most, least, and average pain over a week) and two general health  
40  
41 135 and quality of life questions will be assessed.  
42  
43  
44  
45  
46 136

#### 47 137 *Data collection*

48  
49  
50 138 Data will be collected using electronic case report forms using an online based platform which  
51  
52 139 automatically generates patient identifiers consisting of the hospital code and a number. A subject  
53  
54 140 identification log will be kept in each center by the principal investigator or local coordinating  
55  
56 141 investigator. This subject identification log will contain the personal details which can be used to  
57  
58 142 send questionnaires to patients. Only this dedicated person has the key for decoding patient data. At  
59  
60

1  
2  
3 143 completion of the follow-up period, the database will be exported from the online platform. The  
4  
5 144 database will be hosted on a secure server with the infrastructure, configuration, and licenses that  
6  
7 145 are consistent with current norms and laws to ensure safe and secure data storage and processing.  
8  
9

10 146

11  
12 147 *Sample size and statistical analysis*

13  
14 148 No sample size calculation was conducted as this is an observational cohort study. A previous  
15  
16 149 single center prospective cohort study on the (conservative and surgical) treatment of HCAs and  
17  
18 150 FNHs included 110 patients in 4.5 years.<sup>27</sup> This current study has a broader scope as it spans across at  
19  
20 151 least seven medical centers, includes more BLTC types, and also includes patients treated by  
21  
22 152 interventional radiological procedures. Therefore, the aim is to include at least 450 patients.  
23  
24

25 153 Statistical analyses will be performed using SPSS statistics for Windows version 24.0 (SPSS Inc.,  
26  
27 154 Chicago, IL, USA) and R for Windows version 3.6.3 (R Core Team, Vienna, Austria). Categorical data  
28  
29 155 will be presented as proportions. Continuous data will be presented as mean and standard deviation  
30  
31 156 (SD) or median and interquartile range (IQR). Categorical variables will be compared using the Fisher  
32  
33 157 exact test or the Chi-square test. Continuous variables will be compared using the Mann-Whitney U  
34  
35 158 test or the Student's t-test. Cox proportional hazards model will be used when appropriate. A two-  
36  
37 159 tailed  $P < 0.05$  will be considered statistically significant.  
38  
39

40  
41 160 Scores for each patient-reported outcome measure at the start and end of follow-up will be  
42  
43 161 compared using a paired t-test, and factors associated with significant gain in these measures will be  
44  
45 162 evaluated. Patients will be stratified according to treatment strategy (conservative, surgical,  
46  
47 163 transarterial (chemo-)embolization and lipiodolization, aspiration and sclerotherapy, or  
48  
49 164 radiofrequency or microwave ablation). Sensitivity analyses will be performed for the type of BLTC,  
50  
51 165 and for the time between questionnaires and hospital visits, as hospital visits and imaging may  
52  
53 166 increase the extent of the emotional burden experienced by patients. For surgically treated patients,  
54  
55 167 predictors of a complicated course (Clavien Dindo  $\geq 3b$ ) will also be evaluated.  
56  
57

58 168  
59  
60

1  
2  
3 169 *Trial sites*  
4

5 170 Initiating centers are Amsterdam UMC and University Medical Center Groningen. At least all other

6  
7 171 centers participating in the DBLTG will be included. Participating centers will at least include:  
8

9  
10 172 1. Amsterdam University Medical Centers, Amsterdam, The Netherlands

11  
12 173 2. University Medical Center Groningen, Groningen, The Netherlands

13  
14 174 3. Erasmus Medical Center, Rotterdam, The Netherlands

15  
16 175 4. Maastricht University Medical Center+, Maastricht, The Netherlands

17  
18 176 5. Radboud University Medical Center, Nijmegen, The Netherlands

19  
20 177 6. Leiden University Medical Center, Leiden, The Netherlands  
21

22  
23 178 In order to identify and/or avoid selection bias, non-DBLTG and non-academic centers will also be

24  
25 179 enabled to join during the course of the study.  
26  
27  
28  
29  
30  
31  
32  
33  
34  
35  
36  
37  
38  
39  
40  
41  
42  
43  
44  
45  
46  
47  
48  
49  
50  
51  
52  
53  
54  
55  
56  
57  
58  
59  
60

1  
2  
3 **180 Ethics and dissemination**  
4

5 **181** *Ethical considerations*  
6

7 **182** This trial will be conducted in accordance with the principles of the Declaration of Helsinki and as  
8  
9  
10 **183** stated in the laws governing human research and Good Clinical Practice. The study does not interfere  
11  
12 **184** or change the process of treatment of the BLTCs in the included patients. The study was determined  
13  
14 **185** to be beyond the scope of the Dutch law on research on human subjects (WMO) according to the  
15  
16 **186** Medical Ethics Committee (MEC) of the Amsterdam UMC, location AMC (MEC AMC W19\_134 #  
17  
18 **187** 19.167) and the MEC of the University Medical Center Groningen (MEC UMCG 201900292). The  
19  
20 **188** study will be evaluated by MECs of all participating centers. Moreover, the study will also be  
21  
22 **189** reviewed according to local requirements of each center. Finally, the study proposal was reviewed by  
23  
24 **190** the scientific committee of the DBLTG. All substantial amendments will be notified to these  
25  
26 **191** committees and organizations. Data will be kept for at least fifteen years after study completion.  
27  
28  
29

30 **192**

31  
32 **193** *Informed consent and withdrawal of consent*  
33

34 **194** Informed consent for use of the questionnaires and the data collected from the electronic patient  
35  
36 **195** files will be obtained from all patients by the treating professional in participating centers.  
37  
38 **196** Information will be provided to patients by physicians. This will consist of both printed folders and  
39  
40 **197** links to digital information. A dedicated website has been created (URL:  
41  
42 **198** <https://www.DBLTG.nl/BELIVER/>). Also, dedicated e-mailboxes have been constructed.  
43  
44

45 **199** Patients can withdraw from study participation at any time and without consequences or reason.  
46

47  
48 **200** With each questionnaire that is sent, it is noted that if patients wish to withdraw, they can do so at  
49  
50 **201** any time. In case of withdrawal, patients will be contacted and asked for allowance of data analysis  
51  
52 **202** until that point. There is no specific replacement of individual subjects after withdrawal. Patients  
53  
54 **203** who have chosen to withdraw from the study will receive follow-up and treatment according to  
55  
56 **204** current standard of care by their treating physician. If participants do not respond to questionnaires,  
57  
58  
59  
60

1  
2  
3 205 a reminder will be sent after one month. If there is no reaction to this reminder, patients will be  
4  
5 206 contacted by telephone to verify if they still wish to participate or not.  
6

7 207  
8

9  
10 208 *Additional burden and risk associated with study participation*  
11

12 209 The proposed study does not interfere with standard patient care. No additional blood samples,  
13  
14 210 increase in number of hospital visits, physical examination or other tests are indicated. However, in  
15  
16 211 case of cessation of medical follow-up, patients included in the study will still receive questionnaires.  
17

18 212 There are no direct benefits for patients participating in this study. There are no risks involved  
19  
20 213 with participating in this study. The additional burden of the study is considered to be minimal.  
21

22 214 Completion of the questionnaire will take approximately 15 minutes. The questionnaires might  
23  
24 215 remind patients of their BLTC diagnosis. Some of the questions might be confronting (i.e. questions  
25  
26 216 regarding the impact of complaints on daily life and work).  
27

28 217  
29

30 218 *Administrative aspects, monitoring and publication*  
31

32 219 All results, either positive or negative, will be published in a peer-reviewed journal. All results will  
33  
34 220 be reported suiting reporting guidelines provided by the EQUATOR-network (URL:  
35

36 221 <https://www.equator-network.org/>). All Dutch centers collaborating in the DBLTG will be invited to  
37  
38 222 participate in this study. All results originating from this study will be published on behalf of the  
39

40 223 DBLTG. Co-authorship is available for one physician at each center supplying at least five cases and  
41  
42 224 for two physicians at each center supplying at least ten cases. In each center it may be decided  
43

44 225 individually which one or two physicians will be mentioned as co-authors. Co-authorships may also  
45  
46 226 be offered to persons who contributed substantially to the conceptualization and execution of the  
47

48 227 study. All co-authorships will have to fulfill the international committee of medical journal editors  
49  
50 228 (ICMJE) regulations.<sup>28</sup>  
51

52  
53  
54 229

55 230 In addition to these co-authorships, others involved may be listed as collaborator and the journal  
56  
57 231 will be asked to list them as such also in MEDLINE/PubMed. For each center supplying at least thirty  
58  
59 232  
60



- 1  
2  
3 231 cases, one collaborator may be included; for centers supplying at least forty cases, two collaborators;  
4  
5 232 for centers supplying fifty or more cases, three collaborators.  
6  
7  
8  
9  
10  
11  
12  
13  
14  
15  
16  
17  
18  
19  
20  
21  
22  
23  
24  
25  
26  
27  
28  
29  
30  
31  
32  
33  
34  
35  
36  
37  
38  
39  
40  
41  
42  
43  
44  
45  
46  
47  
48  
49  
50  
51  
52  
53  
54  
55  
56  
57  
58  
59  
60

For peer review only

**List of abbreviations**

|       |                                                                                                            |
|-------|------------------------------------------------------------------------------------------------------------|
| BLTCs | Benign liver tumours and cysts                                                                             |
| FNH   | Focal nodular hyperplasia                                                                                  |
| HCA   | Hepatocellular adenoma                                                                                     |
| MEC   | Medical ethics committee                                                                                   |
| PRO   | Patient reported outcome                                                                                   |
| WMO   | Medical research involving human subjects act; in Dutch: wet medisch-wetenschappelijk onderzoek met mensen |

## References

1. Cristiano A, Dietrich A, Spina JC, Ardiles V, de Santibañes E. Focal nodular hyperplasia and hepatic adenoma: Current diagnosis and management. *Updates Surg.* 2014;66(1):9-21. doi: 10.1007/s13304-013-0222-3
2. Marrero JA, Ahn J, Rajender Reddy K. ACG clinical guideline: The diagnosis and management of focal liver lesions. *Am J Gastroenterol.* 2014;109(9):1328-47. doi: 10.1038/ajg.2014.213
3. EASL clinical practice guidelines on the management of benign liver tumours. *J Hepatol.* 2016;65(2):386-98. doi: 10.1016/j.jhep.2016.04.001
4. Ishak KG, Rabin L. Benign tumours of the liver. *Med Clin North Am.* 1975;59(4):995-1013. doi: 10.1016/s0025-7125(16)31998-8
5. Karhunen PJ. Benign hepatic tumours and tumour like conditions in men. *J Clin Pathol.* 1986;39(2):183-8. doi: 10.1136/jcp.39.2.183
6. Carrim ZI, Murchison JT. The prevalence of simple renal and hepatic cysts detected by spiral computed tomography. *Clin Radiol.* 2003;58(8):626-9. doi: 10.1016/s0009-9260(03)00165-x
7. Charny CK, Jarnagin WR, Schwartz LH, Frommeyer HS, DeMatteo RP, Fong Y, et al. Management of 155 patients with benign liver tumours. *Br J Surg.* 2001;88(6):808-13. doi: 10.1046/j.0007-1323.2001.01771.x
8. Deneve JL, Pawlik TM, Cunningham S, Clary B, Reddy S, Scoggins CR, et al. Liver cell adenoma: A multicenter analysis of risk factors for rupture and malignancy. *Ann Surg Oncol.* 2009;16(3):640-8. doi: 10.1245/s10434-008-0275-6
9. Stoot JH, Coelen RJ, De Jong MC, Dejong CH. Malignant transformation of hepatocellular adenomas into hepatocellular carcinomas: A systematic review including more than 1600 adenoma cases. *HPB (Oxford).* 2010;12(8):509-22. doi: 10.1111/j.1477-2574.2010.00222.x
10. Kon AA. The shared decision-making continuum. *JAMA.* 2010;304(8):903-4. doi: 10.1001/jama.2010.1208

- 1  
2  
3 11. Higginson IJ, Carr AJ. Using quality of life measures in the clinical setting. *BMJ*.  
4  
5 2001;322(7297):1297-300. doi: 10.1136/bmj.322.7297.1297  
6
- 7 12. van Rosmalen BV, de Graeff JJ, van der Poel MJ, de Man IE, Besselink M, Abu Hilal M, et al.  
8  
9 Impact of open and minimally invasive resection of symptomatic solid benign liver tumours on  
10  
11 symptoms and quality of life: A systematic review. *HPB*. 2019;21(9):1119-30. doi:  
12  
13 <https://doi.org/10.1016/j.hpb.2019.02.022>  
14
- 15 13. Kamphues C, Engel S, Denecke T, Bova R, Hippler-Benscheidt M, Puhl G, et al. Safety of liver  
16  
17 resection and effect on quality of life in patients with benign hepatic disease: Single center  
18  
19 experience. *BMC Surg*. 2011;11:16. doi: 10.1186/1471-2482-11-16  
20  
21
- 22 14. Auer TA, Walter-Rittel T, Geisel D, Schöning W, Schmelzle M, Müller T, et al. HBP-enhancing  
23  
24 hepatocellular adenomas and how to discriminate them from FNH in Gd-EOB MRI. *BMC Med*  
25  
26 imaging. 2021;21(1):28. doi: 10.1186/s12880-021-00552-0  
27  
28
- 29 15. Bieze M, van den Esschert JW, Nio CY, Verheij J, Reitsma JB, Terpstra V, et al. Diagnostic accuracy  
30  
31 of MRI in differentiating hepatocellular adenoma from focal nodular hyperplasia: Prospective study  
32  
33 of the additional value of gadoxetate disodium. *AJR Am J Roentgenol*. 2012;199(1):26-34. doi:  
34  
35 [10.2214/ajr.11.7750](https://doi.org/10.2214/ajr.11.7750)  
36  
37
- 38 16. Mezhir JJ, Fourman LT, Do RK, Denton B, Allen PJ, D'Angelica MI, et al. Changes in the  
39  
40 management of benign liver tumours: An analysis of 285 patients. *HPB (Oxford)*. 2013;15(2):156-63.  
41  
42 doi: 10.1111/j.1477-2574.2012.00556.x  
43  
44
- 45 17. van Aerts RMM, Kievit W, de Jong ME, Ahn C, Bañales JM, Reiterová J, et al. Severity in polycystic  
46  
47 liver disease is associated with aetiology and female gender: Results of the International PLD registry.  
48  
49 *Liver Int*. 2019;39(3):575-82. doi: 10.1111/liv.13965  
50  
51
- 52 18. Khalilzadeh O, Baerlocher MO, Shyn PB, Connolly BL, Devane AM, Morris CS, et al. Proposal of a  
53  
54 new adverse event classification by the Society of Interventional Radiology standards of practice  
55  
56 committee. *J Vasc Interv Radiol*. 2017;28(10):1432-7.e3. doi: 10.1016/j.jvir.2017.06.019  
57  
58  
59  
60

- 1  
2  
3 19. Dindo D, Demartines N, Clavien P. Classification of surgical complications: A new proposal with  
4 evaluation in a cohort of 6336 patients and results of a survey. *Ann Surg.* 2004;240(2):205-13. doi:  
5  
6 10.1097/01.sla.0000133083.54934.ae  
7  
8  
9 20. Slankamenac K, Graf R, Barkun J, Puhan MA, Clavien P. The comprehensive complication index: A  
10 novel continuous scale to measure surgical morbidity. *Ann Surg.* 2013;258(1):1-7. doi:  
11  
12 10.1097/SLA.0b013e318296c732  
13  
14  
15 21. Eisenhauer EA, Therasse P, Bogaerts J, Schwartz LH, Sargent D, Ford R, et al. New response  
16 evaluation criteria in solid tumours: Revised RECIST guideline (version 1.1). *Eur J cancer.*  
17 2009;45(2):228-47. doi: 10.1016/j.ejca.2008.10.026  
18  
19  
20  
21 22. Alonso J, Bartlett SJ, Rose M, Aaronson NK, Chaplin JE, Efficace F, et al. The case for an  
22 international patient-reported outcomes measurement information system (PROMIS®) initiative.  
23 *Health Qual Life Outcomes.* 2013;11:210. doi: 10.1186/1477-7525-11-210  
24  
25  
26  
27 23. Terwee CB, Roorda LD, de Vet HC, Dekker J, Westhovens R, van Leeuwen J, et al. Dutch-Flemish  
28 translation of 17 item banks from the patient-reported outcomes measurement information system  
29 (PROMIS). *Qual Life Res.* 2014;23(6):1733-41. doi: 10.1007/s11136-013-0611-6  
30  
31  
32  
33 24. Cella D, Riley W, Stone A, Rothrock N, Reeve B, Yount S, et al. The Patient-Reported Outcomes  
34 easurement Information System (PROMIS) developed and tested its first wave of adult self-reported  
35 health outcome item banks: 2005–2008. *J Clin Epidemiol.* 2010;63(11):1179-94. doi:  
36  
37 10.1016/j.jclinepi.2010.04.011  
38  
39  
40  
41 25. van der Meij E, Anema JR, Leclercq WKG, Bongers MY, Consten ECJ, Schraffordt Koops SE, et al.  
42 Personalised perioperative care by e-health after intermediate-grade abdominal surgery: A  
43 multicentre, single-blind, randomised, placebo-controlled trial. *Lancet.* 2018;392(10141):51-9. doi:  
44  
45 10.1016/s0140-6736(18)31113-9  
46  
47  
48  
49 26. Wesselius HM, van den Ende ES, Alsmas J, ter Maaten JC, Schuit SCE, Stassen PM, et al. Quality  
50 and quantity of sleep and factors associated with sleep disturbance in hospitalized patients. *JAMA*  
51 *Intern Med.* 2018;178(9):1201-8. doi: 10.1001/jamainternmed.2018.2669  
52  
53  
54  
55  
56  
57  
58  
59  
60

1  
2  
3 27. Bieze M, Busch OR, Tanis PJ, Verheij J, Phoa SS, Gouma DJ, et al. Outcomes of liver resection in  
4  
5 hepatocellular adenoma and focal nodular hyperplasia. HPB (Oxford). 2014;16(2):140-9. doi:  
6  
7 10.1111/hpb.12087  
8

9  
10 28. ICMJE Recommendations for the conduct, reporting, editing, and publication of scholarly  
11  
12 work in medical journals. Updated December 2014. Available at  
13  
14 <http://www.icmje.org/icmje-recommendations.pdf>.  
15  
16  
17  
18  
19  
20  
21  
22  
23  
24  
25  
26  
27  
28  
29  
30  
31  
32  
33  
34  
35  
36  
37  
38  
39  
40  
41  
42  
43  
44  
45  
46  
47  
48  
49  
50  
51  
52  
53  
54  
55  
56  
57  
58  
59  
60

For peer review only

## Declarations

### *Authors' contributions*

AF, MPDH, BVvR, MGB, VEdM, JIE: conceptualization of the study

MGB, RAdM, JNMIJ, MGJT, MK, MMEC, MET, AEB, RJdH, EWD, GK, OMvD, JV, RBT, FJCC: investigation and data curation

AF, MPDH, VEdM, JIE: drafting of the manuscript, study coordinators

BVvR, AJK, MGB, RAdM, JNMIJ, MGJT, MK, MMEC, MET, AEB, RJdH, EWD, GK, OMvD, JV, RBT, FJCC: methodology of the study, revision of the manuscript

AF, MPDH, BVvR, AJK, MGB, RAdM, JNMIJ, MGJT, MK, MMEC, MET, AEB, RJdH, EWD, GK, OMvD, JV, RBT, FJCC, VEdM, JIE: approval of the final manuscript.

### *Funding statement*

This work was supported by a grant from the Dutch Society of Gastroenterology (Nederlandse Vereniging voor Gastroenterologie) to the Dutch Benign Liver Tumour Group, and by a personal grant from Amsterdam UMC location AMC to A. Furumaya

### *Competing interests*

The authors declare that they have no competing interests.

*Word count: 2754/4000 words*

## Acknowledgements

Collaborating authors on behalf of the Dutch Benign Liver Tumour Group (DBLTG)

- Isabelle D. Munsterman, Department of Gastroenterology and Hepatology, Radboud UMC, Radboud University, Nijmegen, The Netherlands
- Sandjai Ramsoekh, Department of Gastroenterology and Hepatology, Amsterdam Gastroenterology Endocrinology Metabolism, Amsterdam UMC, Vrije Universiteit, The Netherlands
- Michael D. Doukas, Department of Pathology, Erasmus MC, Erasmus University Rotterdam, Rotterdam, The Netherlands
- Jan C. Beckervordersandforth, Department of Pathology, Maastricht University Medical Center+, Maastricht University, Maastricht, The Netherlands
- Christiaan van der Leij, Department of Radiology, Maastricht University Medical Center+, Maastricht University, Maastricht, The Netherlands
- Razvan Miclea, Department of Radiology, Maastricht University Medical Center+, Maastricht University, Maastricht, The Netherlands
- Eric T.T.L. Tjwa, Department of Gastroenterology and Hepatology, Radboud UMC, Radboud University, Nijmegen, The Netherlands
- Peter B. van den Boezem, Department of Surgery, Radboud UMC, Radboud University, Nijmegen, The Netherlands
- Hans H.W. de Wilt, Department of Surgery, Radboud UMC, Radboud University, Nijmegen, The Netherlands



- 1  
2  
3 • Sebastiaan van Koeverden, Department of Radiology, Radboud UMC, Radboud University,  
4 Nijmegen, The Netherlands  
5  
6  
7
- 8 • Andries E. Braat, Department of Surgery, Leiden UMC, Leiden University, The Netherlands  
9  
10
- 11 • Minneke J. Coenraad, Department of Gastroenterology and Hepatology, Leiden UMC,  
12 Leiden University, Leiden, The Netherlands  
13  
14  
15
- 16 • Stijn S.L.P. Crobach, Department of Pathology, Leiden UMC, Leiden University, The  
17 Netherlands  
18  
19  
20  
21  
22
- 23 • Shirin Feshtali, Department of Radiology, Leiden UMC, Leiden University, Leiden, The  
24 Netherlands  
25  
26  
27
- 28 • Mark C. Burgmans, Department of Radiology, Leiden UMC, Leiden University, Leiden, The  
29 Netherlands  
30  
31  
32
- 33 • Koert P. de Jong, Department of Surgery, University Medical Center Groningen, University  
34 of Groningen, Groningen, The Netherlands  
35  
36  
37  
38
- 39 • Thomas M. van Gulik, Department of Surgery, Amsterdam Gastroenterology  
40 Endocrinology Metabolism, Amsterdam UMC, University of Amsterdam, The Netherlands  
41  
42  
43  
44
- 45 • Rutger-Jan Swijnenburg, Department of Surgery, Amsterdam Gastroenterology  
46 Endocrinology Metabolism, University of Amsterdam, The Netherlands  
47  
48  
49  
50  
51  
52  
53  
54  
55  
56  
57  
58  
59  
60

## Figures

Figure title: Figure 1

Figure legend: An overview of the hospital visits and study questionnaires of two fictional patients included in the study are shown. In general, patients receive a questionnaire every six months. Deviations from this normal course of follow-up caused by patients undergoing an intervention are indicated by red questionnaires. Please note that these two patients were included around similar dates, but total follow-up durations might differ between patients depending on the date of inclusion.

Table 1 Overview of recorded variables

| Baseline information                                     |                                                                                | Tumor or cyst specific questions |                                 | Treatment characteristics   |                                                                                                          |                                                                                                          |
|----------------------------------------------------------|--------------------------------------------------------------------------------|----------------------------------|---------------------------------|-----------------------------|----------------------------------------------------------------------------------------------------------|----------------------------------------------------------------------------------------------------------|
| Patient characteristics                                  | Tumor/cyst characteristics*                                                    | Solid lesions                    | Cystic lesions                  | Intervention                | Surgery                                                                                                  | Interventional radiology                                                                                 |
| Age                                                      | Total number of lesions at baseline                                            | Focal nodular hyperplasia        | Simple hepatic cysts            | Date of intervention        | Type of approach (open, laparoscopic, robot)                                                             | Type of procedure (aspiration sclerotherapy, TAE, RFA/MWA)                                               |
| Sex                                                      | Location of lesion (left hemiliver, right hemiliver, bilobar)                  | Hemangioma                       | Mucinous cystic neoplasms       | Duration of hospital stay   | Occurrence and reason for conversion                                                                     | Sclerotherapy (volume of aspiration, length of sclerosing, type of sclerosing agent)                     |
| Mortality<br>If yes, reason                              | Type of lesion                                                                 | Hepatocellular adenoma           | Intraductal papillary neoplasms | Operation or procedure time | Type of procedure (fenestration, wedge resection, segmental resection, hemihepatectomy, transplantation) | TAE (volume and type of embolization agent [simple embolization, chemo-embolization or lipiodolization]) |
| Comorbidity (ASA score and Elixhauser comorbidity index) | Diameter, date and modality of diagnosis                                       |                                  |                                 | 30-day and 90-day mortality | Specification of resected segments                                                                       |                                                                                                          |
|                                                          | Diameter, date and modality of follow-up                                       |                                  |                                 |                             | Amount of blood loss                                                                                     |                                                                                                          |
|                                                          | Occurrence of misdiagnosis<br>If so, revised diagnosis and diagnostic modality |                                  |                                 |                             | Additional procedures (e.g. argon beam coagulation, omental transposition, concurring cholecystectomy)   |                                                                                                          |
|                                                          | Histopathological diagnosis with immunohistochemistry if available             |                                  |                                 |                             | Complications (type, CD, CCI & SIR)                                                                      |                                                                                                          |

Abbreviations: ASA: American society of anesthesiologists; TAE, transarterial embolization; RFA, radiofrequency ablation; MWA, microwave ablation; CD, Clavien-Dindo; CCI, comprehensive complication index; SIR, society of interventional radiologists classification for adverse events.\* According to RECISTv1.1 criteria, lesions will only be measured on CT or MRI (longest diameter), measured on the transversal plane on post-contrast series. Maximum of two lesions. If the target lesion is not visible on follow-up imaging (index imaging is imaging shortest before inclusion), then the diameter of the next largest tumor will be measured.

1  
2  
3  
4  
5  
6  
7  
8  
9  
10  
11  
12  
13  
14  
15  
16  
17  
18  
19  
20  
21  
22  
23  
24  
25  
26  
27  
28  
29  
30  
31  
32  
33  
34  
35  
36

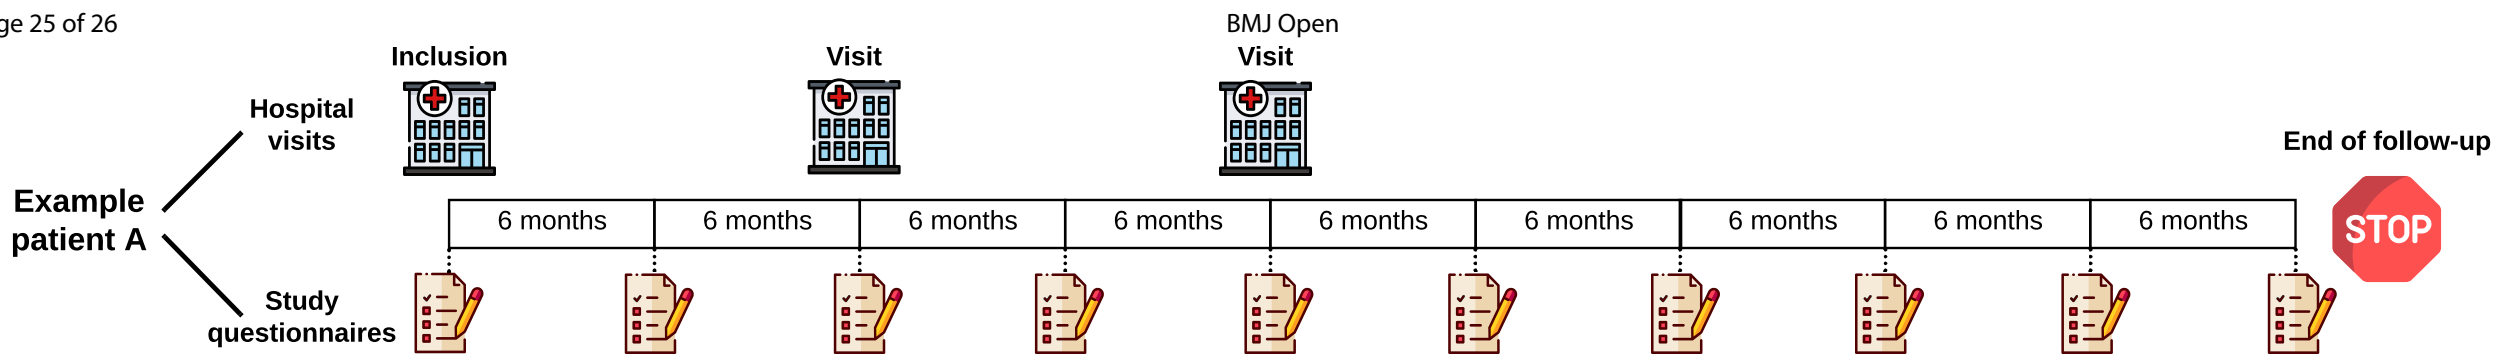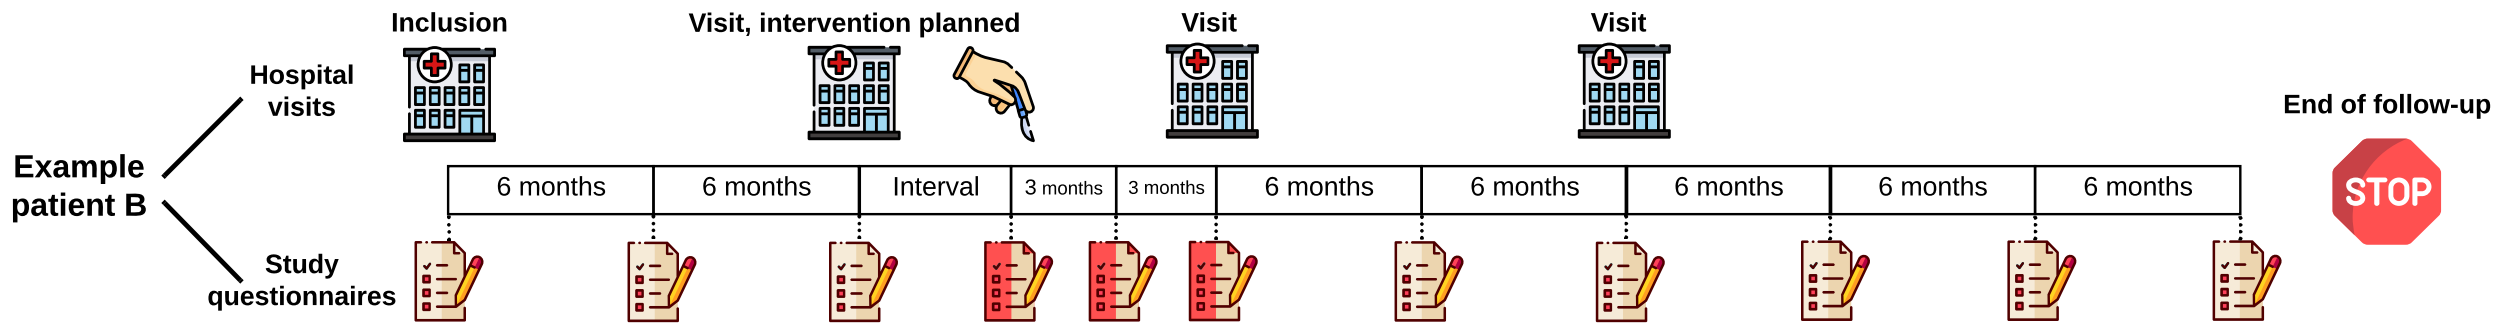

**Legend**

- Deviation from regular follow-up after an intervention (surgery or interventional radiology), after which follow-up frequency is temporarily increased.
- Intervention: surgery or interventional radiology.

For peer review only - <http://bmjopen.bmj.com/site/about/guidelines.xhtml>

**Supplemental Material to “Study protocol for a multicenter nationwide prospective cohort study to investigate the natural course and clinical outcome in benign liver tumors and cysts in the Netherlands: the BELIVER study”**

STROBE Statement—Checklist of items that should be included in reports of *cohort studies*

|                              | Item No | Recommendation                                                                                                                                                                                    | Line No                     |
|------------------------------|---------|---------------------------------------------------------------------------------------------------------------------------------------------------------------------------------------------------|-----------------------------|
| <b>Title and abstract</b>    | 1       | (a) Indicate the study’s design with a commonly used term in the title or the abstract                                                                                                            | Title page                  |
|                              |         | (b) Provide in the abstract an informative and balanced summary of what was done and what was found                                                                                               | 1-23                        |
| <b>Introduction</b>          |         |                                                                                                                                                                                                   |                             |
| Background/rationale         | 2       | Explain the scientific background and rationale for the investigation being reported                                                                                                              | 38-61                       |
| Objectives                   | 3       | State specific objectives, including any prespecified hypotheses                                                                                                                                  | 62-65                       |
| <b>Methods</b>               |         |                                                                                                                                                                                                   |                             |
| Study design                 | 4       | Present key elements of study design early in the paper                                                                                                                                           | 68-69                       |
| Setting                      | 5       | Describe the setting, locations, and relevant dates, including periods of recruitment, exposure, follow-up, and data collection                                                                   | 80-81<br>171-180<br>195-207 |
| Participants                 | 6       | (a) Give the eligibility criteria, and the sources and methods of selection of participants. Describe methods of follow-up                                                                        | 76-79<br>82-88              |
|                              |         | (b) For matched studies, give matching criteria and number of exposed and unexposed                                                                                                               | N/A                         |
| Variables                    | 7       | Clearly define all outcomes, exposures, predictors, potential confounders, and effect modifiers. Give diagnostic criteria, if applicable                                                          | 91-123                      |
| Data sources/<br>measurement | 8*      | For each variable of interest, give sources of data and details of methods of assessment (measurement). Describe comparability of assessment methods if there is more than one group              | 97-123                      |
| Bias                         | 9       | Describe any efforts to address potential sources of bias                                                                                                                                         | 104-108                     |
| Study size                   | 10      | Explain how the study size was arrived at                                                                                                                                                         | 149-153                     |
| Quantitative variables       | 11      | Explain how quantitative variables were handled in the analyses. If applicable, describe which groupings were chosen and why                                                                      | 154-160                     |
| Statistical methods          | 12      | (a) Describe all statistical methods, including those used to control for confounding                                                                                                             | 161-168                     |
|                              |         | (b) Describe any methods used to examine subgroups and interactions                                                                                                                               | 163-165<br>167-168          |
|                              |         | (c) Explain how missing data were addressed                                                                                                                                                       | N/A                         |
|                              |         | (d) If applicable, explain how loss to follow-up was addressed                                                                                                                                    | N/A                         |
|                              |         | (e) Describe any sensitivity analyses                                                                                                                                                             | 165-167                     |
| <b>Results</b>               |         |                                                                                                                                                                                                   |                             |
| Participants                 | 13*     | (a) Report numbers of individuals at each stage of study—eg numbers potentially eligible, examined for eligibility, confirmed eligible, included in the study, completing follow-up, and analysed | N/A                         |
|                              |         | (b) Give reasons for non-participation at each stage                                                                                                                                              | N/A                         |
|                              |         | (c) Consider use of a flow diagram                                                                                                                                                                | N/A                         |
| Descriptive data             | 14*     | (a) Give characteristics of study participants (eg demographic, clinical, social) and information on exposures and potential confounders                                                          | N/A                         |

|    |                          |                                                                                                                                                                                                                 |                               |
|----|--------------------------|-----------------------------------------------------------------------------------------------------------------------------------------------------------------------------------------------------------------|-------------------------------|
| 1  |                          | (b) Indicate number of participants with missing data for each variable of interest                                                                                                                             | N/A                           |
| 2  |                          | (c) Summarise follow-up time (eg, average and total amount)                                                                                                                                                     | N/A                           |
| 3  |                          |                                                                                                                                                                                                                 |                               |
| 4  | Outcome data             | 15* Report numbers of outcome events or summary measures over time                                                                                                                                              | N/A                           |
| 5  | Main results             | 16 (a) Give unadjusted estimates and, if applicable, confounder-adjusted estimates and their precision (eg, 95% confidence interval). Make clear which confounders were adjusted for and why they were included | N/A                           |
| 6  |                          | (b) Report category boundaries when continuous variables were categorized                                                                                                                                       | N/A                           |
| 7  |                          | (c) If relevant, consider translating estimates of relative risk into absolute risk for a meaningful time period                                                                                                | N/A                           |
| 8  |                          |                                                                                                                                                                                                                 |                               |
| 9  |                          |                                                                                                                                                                                                                 |                               |
| 10 |                          |                                                                                                                                                                                                                 |                               |
| 11 |                          |                                                                                                                                                                                                                 |                               |
| 12 | Other analyses           | 17 Report other analyses done—eg analyses of subgroups and interactions, and sensitivity analyses                                                                                                               | N/A                           |
| 13 |                          |                                                                                                                                                                                                                 |                               |
| 14 |                          |                                                                                                                                                                                                                 |                               |
| 15 | <b>Discussion</b>        |                                                                                                                                                                                                                 |                               |
| 16 | Key results              | 18 Summarise key results with reference to study objectives                                                                                                                                                     | N/A                           |
| 17 | Limitations              | 19 Discuss limitations of the study, taking into account sources of potential bias or imprecision. Discuss both direction and magnitude of any potential bias                                                   | 101-108<br>126-134<br>210-217 |
| 18 |                          |                                                                                                                                                                                                                 |                               |
| 19 |                          |                                                                                                                                                                                                                 |                               |
| 20 |                          |                                                                                                                                                                                                                 |                               |
| 21 | Interpretation           | 20 Give a cautious overall interpretation of results considering objectives, limitations, multiplicity of analyses, results from similar studies, and other relevant evidence                                   | N/A                           |
| 22 |                          |                                                                                                                                                                                                                 |                               |
| 23 |                          |                                                                                                                                                                                                                 |                               |
| 24 |                          |                                                                                                                                                                                                                 |                               |
| 25 | Generalisability         | 21 Discuss the generalisability (external validity) of the study results                                                                                                                                        | N/A                           |
| 26 |                          |                                                                                                                                                                                                                 |                               |
| 27 | <b>Other information</b> |                                                                                                                                                                                                                 |                               |
| 28 | Funding                  | 22 Give the source of funding and the role of the funders for the present study and, if applicable, for the original study on which the present article is based                                                | Title<br>Page                 |
| 29 |                          |                                                                                                                                                                                                                 |                               |
| 30 |                          |                                                                                                                                                                                                                 |                               |

31  
32 \*Give information separately for exposed and unexposed groups.

33  
34  
35 **Note:** An Explanation and Elaboration article discusses each checklist item and gives methodological background and published examples of transparent reporting. The STROBE checklist is best used in conjunction with this article (freely available on the Web sites of PLoS Medicine at <http://www.plosmedicine.org/>, Annals of Internal Medicine at <http://www.annals.org/>, and Epidemiology at <http://www.epidem.com/>). Information on the STROBE Initiative is available at <http://www.strobe-statement.org>.

36  
37  
38  
39  
40  
41  
42  
43  
44  
45  
46  
47  
48  
49  
50  
51  
52  
53  
54  
55  
56  
57  
58  
59  
60
